# Supplementary material
Source: ML conference proceedings conference paper supplement (https://openreview.net/forum?id=kHLEYGI9x9)
Supplement: supplementary_material [file Main.pdf › Robust/Main.pdf]

---

# Robust Equilibria in Continuous Games: From Strategic to Dynamic Robustness

---

Anonymous Author(s)

Affiliation

Address

email

## Abstract

1 In this paper, we examine the robustness of Nash equilibria in continuous games,  
2 under both strategic and dynamic uncertainty. Starting with the former, we intro-  
3 duce the notion of a *robust equilibrium* as those equilibria that remain invariant to  
4 small—but otherwise arbitrary—perturbations to the game’s payoff structure, and  
5 we provide a crisp geometric characterization thereof. Subsequently, we turn to  
6 the question of dynamic robustness, and we examine which equilibria are stable  
7 limit points of the dynamics of “*follow the regularized leader*” (FTRL) in the  
8 presence of randomness and uncertainty. Despite their very distinct origins, we  
9 establish a structural correspondence between these two notions of robustness:  
10 strategic robustness implies dynamic robustness, and, conversely, the requirement  
11 of strategic robustness cannot be relaxed if dynamic robustness is to be maintained.  
12 Finally, we examine the rate of convergence to robust equilibria as a function  
13 of the underlying regularizer, and we show that entropically regularized learning  
14 converges at a geometric rate in games with affinely constrained action spaces.

## 1 Introduction

16 A fundamental requirement in game theory—which predates even the cornerstone notion of a Nash  
17 equilibrium—concerns the robustness that should be inherent in any axiomatization of rational  
18 behavior. To quote a famous passage by von Neumann & Morgenstern [39, p. 32]: “In whatever way  
19 we formulate the guiding principles and the objective justification of rational behavior, provisos will  
20 have to be made for every possible conduct of “the others.” If the superiority of rational behavior  
21 over any other kind is to be established, then its description must include rules of conduct for all  
22 conceivable situations—including those where “the others” behaved irrationally in the sense of the  
23 standards which the theory will set for them.”

24 As a byproduct of this tenet, there has been a flurry of activity since the 1970s in proposing refinements  
25 of the Nash equilibrium concept trying to dismiss equilibria that are highly fragile or otherwise  
26 implausible (e.g., because they involve incredible threats).<sup>1</sup> This pursuit of robustness has recently  
27 gained increased momentum owing to the applications of game theory to machine learning and data  
28 science, two fields where the notion of robustness has been likewise elusive. Here, even though many  
29 game-theoretic solutions perform extremely well on specific tasks—such as a well-trained generative  
30 adversarial network (GAN) at equilibrium—the resulting models tend to have a narrow performance  
31 envelope, being brittle, and unable to adapt to situations that deviate from their initial configuration.

32 In game-theoretic terms, this highlights the fact that, even though a Nash equilibrium is resilient  
33 to unilateral deviations, it need not be robust to small perturbations in the *payoff data* of the game

---

<sup>1</sup>For a masterful introduction to the topic, see the textbook of van Damme [38].

34 (which, in a machine learning context, could represent distributional shifts, incomplete observations,  
35 and/or other sources of uncertainty). In view of this, it is natural to ask

36 *Which equilibria are robust in the presence of uncertainty?*

37 This question has been the lodestar of the equilibrium refinement literature, and it has led to a wide  
38 array of proposals aiming to get rid of “unreasonable” equilibria that may disappear even under the  
39 most minute perturbation to the players’ payoffs—from Selten’s notion of *trembling hand perfection*  
40 [32], to Myerson’s concept of *properness* [26], and the various criteria of strategic stability introduced  
41 by Kohlberg & Mertens [20] (hyperstability, full stability, sequential stability, etc.).

42 Dually to the above theory of “strategic refinement”, an important alternative approach has been  
43 based on *dynamic* considerations: that is, the players of a game start off-equilibrium, and in one sense  
44 or another learn (or fail to learn) to play an equilibrium over time. Here, the focus is on the players’  
45 learning protocol, the information available during play, and the presence (or absence) of players that  
46 may deviate from this protocol. By the so-called “folk theorem of evolutionary game theory” [18],  
47 it is well known that only *strict* equilibria are stable and attracting under the replicator dynamics, a  
48 result which was extended more recently to a broad class of “regularized learning” schemes, in both  
49 continuous [14] and discrete time [15, 16].

50 These two viewpoints are not always compatible: for instance, in  $2 \times 2$  games with two pure equilibria  
51 and one mixed (such as the Chicken / Hawk-Dove game), the mixed equilibrium is ruled out by  
52 almost all game-theoretic learning algorithms and dynamics, even though it survives a broad range of  
53 strategic refinement attacks. A point of hope here is the equivalence between (setwise) strategic and  
54 dynamic stability proved by Ritzberger & Weibull [28], who showed that a span of pure strategies in  
55 the mixed extension of a finite game is strategically stable in the sense of Kohlberg & Mertens [20] if  
56 and only if it is asymptotically stable under the replicator dynamics—see also [10] for an extension  
57 to a wider class of discrete-time models for learning, with different information assumptions.

58 Notably, these considerations all concern finite games in normal (or extensive) form. By contrast,  
59 most applications of game theory to machine learning and data science involve *continuous games*,  
60 that is, games with a finite number of players and a continuum of actions per player—for example,  
61 GANs, multi-agent reinforcement learning, Kelly auctions, etc. In view of this, our paper seeks to  
62 answer the following questions in the context of continuous games:

63 *Which equilibria remain robust to arbitrary, small perturbations of the underlying game?*

64 *Which equilibria remain robust to small perturbations in the initialization of the players’ dynamics?*

65 We refer to these two questions as *strategic* and *dynamic robustness*, respectively, and our paper seeks  
66 to quantify the interplay between the two.

67 **Our contributions in the context of related work.** Aiming for the strongest possible definition of  
68 robustness, we propose the following strategic refinement criterion: an equilibrium of a continuous  
69 game is *strategically robust* if it remains an equilibrium in any slightly perturbed, nearby game. This  
70 requirement is similar in spirit to—but considerably stronger than—the classical notion of *essentiality*  
71 of Wu & Jiang [41], which posits that any nearby game has a nearby, possibly different equilibrium.  
72 Importantly, our results apply to *local* Nash equilibria, which are especially relevant in machine  
73 learning applications where payoff landscapes are typically nonconcave. This distinction is crucial,  
74 as global Nash equilibria do not always exist in general continuous games, making local equilibrium  
75 guarantees both meaningful and necessary in practice.

76 In contrast to finite games—where the notion of “nearby” is fairly unambiguous—perturbations to  
77 a continuous game involve functional variations and, as such, the choice of distance metric plays a  
78 crucial role. Importantly, albeit natural, our proposed robustness requirement becomes vacuous if  
79 distances are measured with respect to the players’ payoff functions: more precisely, it is always  
80 possible to find a payoff perturbation with arbitrarily small  $L^\infty$ -norm that ends up upsetting *any*  
81 equilibrium. The underlying issue here is that a small payoff perturbation may exhibit very high  
82 local variability, which can disrupt the first-order stationarity conditions that characterize equilibria  
83 in continuous games, thereby eliminating them altogether. To circumvent this issue, we argue that  
84 deviations of continuous games should be measured by comparing their respective gradient fields,  
85 which encode all the strategic information in the game. This shift in perspective leads to a crisp  
86 geometric characterization of strategically robust equilibria: they are extreme points of the game’s

87 action space, and they are sharp in the sense that the game’s individual payoff gradients form a strictly  
 88 acute angle with any tangent direction (cf. Fig. 1 later in the paper).

89 From a dynamic standpoint, we focus throughout on the “*follow the regularized leader*” (FTRL)  
 90 family of algorithms [23, 33–35], arguably one of the most—if not *the* most—popular class of  
 91 policies for online learning due to its strong regret minimization and convergence guarantees, and  
 92 containing as special cases gradient descent/ascent methods [3, 44], dual averaging [27, 42], the  
 93 exponential / multiplicative weights algorithm [2, 5, 5, 24, 40], implicitly normalized forecasters  
 94 [1, 4, 43], exponentiated gradient methods [7, 19, 37], and many iterative first-order learning schemes.  
 95 In this general context, we examine which equilibria admit robust convergence guarantees as stable  
 96 limit points of the dynamics of FTRL in the presence of randomness and uncertainty.

97 Our first main result in this setting is that *strategic robustness implies dynamic robustness*, i.e., any  
 98 strategically robust equilibrium is stable and attracting with high probability under the dynamics of  
 99 FTRL, for any choice of regularizer. Conversely, we show that the strategic robustness requirement  
 100 cannot be lifted, and we provide an example of a game with an extreme, non-robust equilibrium  
 101 which attracts *all* FTRL orbits under a certain choice of regularizer, and *none* under another.

102 To the best of our knowledge, this is the first result of its kind for continuous games. In the context of  
 103 *finite* games, Flokas et al. [14] showed that a point is asymptotically stable under the continuous-time  
 104 FTRL dynamics if and only if it is a strict Nash equilibrium, while [10] extended this equivalence to  
 105 discrete-time models of regularized learning under uncertainty. Strict equilibria are prime examples  
 106 of strategically robust equilibria, so this part of the analysis of [10] is subsumed in ours. In the  
 107 context of concave games—that is, continuous games with individually concave payoff functions—  
 108 Mertikopoulos & Zhou [25] showed that sharp global equilibria enjoy comparable convergence  
 109 guarantees under FTRL with a vanishing step-size. While such step-size schedules are effective at  
 110 suppressing noise in the long run, they do so at the cost of significantly slowing down the algorithm’s  
 111 convergence. By contrast, we focus on fast, *constant* step-size schedules, which are widely used in  
 112 practice due to their simplicity and often superior empirical performance. In this regime, we show  
 113 that entropically regularized learning with a constant step-size converges to robust equilibria at a  
 114 geometric rate, compared to distinctly subgeometric rate in the case of vanishing step-size policies.

## 115 2 Preliminaries

116 We start by briefly reviewing some basics of game theory and regularized learning, introducing the  
 117 necessary context for our results.

118 **2.1. The game-theoretic framework.** Throughout our paper, we focus on a class of *continuous*  
 119 *games* consisting of a finite set of  $i \in \mathcal{N} = \{1, \dots, N\}$ , and defined by the following primitives:

- 120 1. Each player  $i \in \mathcal{N}$  has access to a compact convex set  $\mathcal{X}_i$  of a finite dimensional vector space  
 121  $\mathcal{V}_i$ , describing the set of *actions* available to said player. By  $\mathcal{X} := \prod_i \mathcal{X}_i$  we denote the space of  
 122 all ensembles  $x = (x_1, \dots, x_N)$  of actions  $x_i \in \mathcal{X}_i$  that are independently chosen by each player  
 123  $i \in \mathcal{N}$ . We will also write  $x = (x_i; x_{-i})$  to emphasize the action of player  $i \in \mathcal{N}$  against the joint  
 124 action profile  $x_{-i} \equiv (x_j)_{j \neq i}$  of all other players.
- 125 2. The players’ rewards are determined by their individual *payoff functions*  $u_i: \mathcal{X} \rightarrow \mathbb{R}$ , assumed to  
 126 be continuously differentiable for all  $i \in \mathcal{N}$ . Denoting by  $\mathcal{Y}_i \equiv \mathcal{V}_i^*$  the dual space of  $\mathcal{V}_i$ , we define  
 127 the individual gradient vector  $v_i: \mathcal{X} \rightarrow \mathcal{Y}_i$  of player  $i \in \mathcal{N}$  by

$$v_i(x) = \nabla_{x_i} u_i(x_i; x_{-i}) \quad (1)$$

128 and the ensemble  $v(x) = (v_1(x), \dots, v_N(x)) \in \mathcal{Y} \equiv \prod_{i \in \mathcal{N}} \mathcal{Y}_i$  thereof.

129 A *continuous game* is then defined as a tuple  $\mathcal{G} \equiv \mathcal{G}(\mathcal{N}, \mathcal{X}, u)$  with players, actions and payoff  
 130 functions as above.

131 **Nash equilibrium.** The best known solution concept in game theory is that of a *Nash equilib-*  
 132 *rium* (NE), which characterizes the actions  $x^* \in \mathcal{X}$  from which no player has incentive to deviate  
 133 unilaterally. Formally,  $x^* \in \mathcal{X}$  is a Nash equilibrium if

$$u_i(x^*) \geq u_i(x_i; x_{-i}^*) \quad \text{for all } x_i \in \mathcal{X}_i, i \in \mathcal{N}. \quad (\text{NE})$$

A game  $\mathcal{G} \equiv \mathcal{G}(\mathcal{N}, \mathcal{X}, u)$  always admits a Nash equilibrium if  $\mathcal{X}$  is compact and each player’s payoff function  $u_i$  is *individually concave* in the sense that  $u_i(x_i; x_{-i})$  is concave in  $x_i$  for all  $x_{-i} \in \mathcal{X}_{-i}$  [13, 31]. In this case, basic arguments from convex analysis [29, 30] show that  $x^*$  is an equilibrium of  $\mathcal{G}$  if and only if it satisfies the (Stampacchia) variational inequality

$$\langle v(x^*), x - x^* \rangle \leq 0 \quad \text{for all } x \in \mathcal{X}. \quad (\text{VI})$$

If the players’ functions are not individually concave, a game may not admit a Nash equilibrium. In that case, it is more meaningful to consider *local* Nash equilibria, i.e., profiles  $x^* \in \mathcal{X}$  such that

$$u_i(x^*) \geq u_i(x_i; x_{-i}^*) \quad \text{for all } x \text{ in a neighborhood } \mathcal{U} \text{ of } x^* \text{ in } \mathcal{X}. \quad (\text{LNE})$$

In stark contrast to games with individually concave payoff functions, (VI) no longer characterizes local Nash equilibria: specifically, by first-order stationarity, we have (LNE)  $\implies$  (VI) but the converse need not hold; in fact, a solution  $x^*$  of (VI) may be a global payoff *maximizer* for all  $i \in \mathcal{N}$ .

*Note.* In the sequel, we will work with general continuous games that may not admit a global equilibrium—but admit *local* Nash equilibria. To streamline our presentation, we will use the term “equilibrium” without any further qualification to refer to *local* equilibria, and we will say explicitly “global equilibria” for profiles satisfying (NE).

**2.2. Regularized learning in games.** The most widely used framework for learning in games, is the so called “*follow the regularized leader*” (FTRL) template, primarily because it leads to no regret in a wide variety of settings [34, 35]. The corresponding update rule hinges on the notion of a *regularized best response*, and proceeds as

$$y_{n+1} = y_n + \gamma \hat{v}_n, \quad x_n = Q(y_n) \quad \text{for } n = 1, 2, \dots \quad (\text{FTRL})$$

where (i)  $x_n \in \mathcal{X}$  denotes the players’ action profile at step  $n$ ; (ii)  $y_n = (y_{i,n})_{i \in \mathcal{N}} \in \mathcal{Y}$  is an auxiliary process that aggregates historical feedback into a compact state representation, i.e., a proxy for the players’ empirical performance up to time  $n$ ; (iii)  $\hat{v}_n = (\hat{v}_{i,n})_{i \in \mathcal{N}} \in \mathcal{Y}$  denotes the current gradient-like payoff signal; (iv)  $\gamma > 0$  is the learning rate, or step-size parameter of the process; and (v)  $Q: \mathcal{Y} \rightarrow \mathcal{X}$  is a mapping between the auxiliary process on the dual space  $\mathcal{Y}$ , and the players’ strategy space  $\mathcal{X}$ . In what follows, we analyze the key components of this framework.

**The algorithm’s step-size.** Throughout this work, we adopt a *constant* step-size routine. This stands in contrast to the stochastic approximation literature [8, 11, 21], where (FTRL) is typically implemented with a *vanishing* step-size satisfying the classical summability conditions  $\sum_n \gamma_n = \infty$ ,  $\sum_n \gamma_n^2 < \infty$ . Such schedules are known to promote convergence by gradually suppressing the effect of noise [25]. In contrast, constant step-size methods are widely favored in practice for their simplicity, reduced hyperparameter sensitivity, and improved robustness in real-world applications

**The mirror map.** A central ingredient of regularized learning is the mirror map  $Q \equiv (Q_i)_{i \in \mathcal{N}}$ , with each  $Q_i: \mathcal{Y}_i \rightarrow \mathcal{X}_i$  induced by a strongly convex *regularizer*  $h_i: \mathcal{X}_i \rightarrow \mathbb{R}$  that promotes stability during the learning process. To streamline our presentation and letting  $h(x) = \sum_{i \in \mathcal{N}} h_i(x_i)$ , the players’ *mirror map* is defined as

$$Q(y) := \arg \max_{x \in \mathcal{X}} \{ \langle y, x \rangle - h(x) \} \quad (2)$$

In the rest of our paper, we will write  $\mathcal{X}_h = \text{im } Q$  for the image of  $\mathcal{Y}$  under  $Q$ —and, likewise,  $\mathcal{X}_{h_i} = \text{im } Q_i$  for each player  $i \in \mathcal{N}$ . In particular, if  $Q$  is interior-valued—that is,  $\mathcal{X}_h = \text{ri } \mathcal{X}$ —we will say that  $h$  is *steep* because, in this case, the (sub)gradients of  $h$  explode to infinity as  $x \rightarrow \text{bd } \mathcal{X}$  (i.e.,  $h$  becomes “infinitely steep”); instead, if  $\text{im } Q = \mathcal{X}$ , we will say that  $h$  is *non-steep*. For a precise version of this discussion, see [Appendix A](#).

Different choices of the regularizer  $h$  induce different projection-like operations, adapted to the geometry of the underlying space. We describe two mainstay examples below.

**Example 2.1** (Euclidean projection). The quadratic regularizer  $h(x) = \|x\|_2^2/2$  gives rise to the Euclidean projection  $Q(y) = \text{proj}_{\mathcal{X}}(y) = \arg \min_{x \in \mathcal{X}} \|y - x\|_2$ . In this case,  $h$  is non-steep.  $\heartsuit$

**Example 2.2** (Multiplicative weights). For  $\mathcal{A}_i$  a *finite* set of actions per player  $i \in \mathcal{N}$ , and  $\mathcal{X}_i \equiv \Delta(\mathcal{A}_i)$ , the entropic regularizer  $h_i(x_i) = \sum_{\alpha_i \in \mathcal{A}_i} x_{i\alpha_i} \log x_{i\alpha_i}$  gives rise to the logit map, defined via  $Q_i(y_i) = \exp(y_i) / \|\exp(y_i)\|_1$ , where  $\exp(y_i)$  denotes the element-wise exponential of  $y_i$ .  $\heartsuit$

179 **The feedback process.** Throughout this work, we consider two distinct feedback models:  
 180 (i) *stochastic gradients*; and (ii) *payoff-based* feedback. We describe both frameworks below.

181 **Stochastic gradient feedback.** At every time step  $n$ , each player  $i \in \mathcal{N}$  has access to a *stochastic*  
 182 *first-order oracle* (SFO) – that is, a noisy version of their individual gradient vector of the form:

$$\hat{v}_n = v(x_n) + U_n \quad \text{with} \quad \mathbb{E}[U_n | \mathcal{F}_n] = 0 \quad (\text{SFO})$$

183 where  $U_n$  is zero-mean and conditionally sub-Gaussian given the information  $\mathcal{F}_n$  generated up to  
 184 time  $n \in \mathbb{N}$ . In other words, players observe unbiased estimates of their individual gradient vectors.

185 **Payoff-based feedback.** Unlike the (SFO) model where players have access to a black-box oracle  
 186 that provides noisy gradient information, it is often more realistic to consider a payoff-based feedback  
 187 paradigm where players observe *only* their realized payoffs – that is, a single scalar value – and have  
 188 to reconstruct an estimate of their individual gradient vectors.

189 The most widely used method in this setting is the *single-point stochastic approximation* (SPSA)  
 190 framework of [12, 36], which is based on finite differences along randomly sampled directions.  
 191 Specifically, denoting the set of unit directions  $\mathcal{E}_i := \{\pm e_1, \dots, \pm e_{d_i}\}$  that span the affine hull of  $\mathcal{X}_i$   
 192 of dimension  $d_i$ , each player  $i \in \mathcal{N}$  draws a direction  $w_{i,n} \in \mathcal{E}_i$  uniformly at random in every round  
 193  $n \in \mathbb{N}$ . Since the perturbed action  $x_{i,n} + \varepsilon_n w_{i,n}$  may lie outside  $\mathcal{X}_i$  for a perturbation radius  $\varepsilon_n > 0$ ,  
 194 we introduce a pivot element  $p_i \in \text{ri}(\mathcal{X}_i)$  and a radius  $r_i > \varepsilon_n$  such that  $p_i + r_i w_i \in \mathcal{X}_i$  for all  
 195  $w_i \in \mathcal{E}_i$ . Based on these, we define the feasibility-adjusted action  $x_{i,n}^\varepsilon := x_{i,n} + (\varepsilon_n/r_i)(p_i - x_{i,n}) \in \mathcal{X}_i$ .  
 196 Finally, each player queries the perturbed action  $\hat{x}_{i,n} \equiv x_{i,n}^\varepsilon + \varepsilon_n w_{i,n}$  which is an element of  $\mathcal{X}_i$ , and  
 197 observes the realized payoff value  $u_i(\hat{x}_n)$ .<sup>2</sup> The gradient vector is, then, estimated via the single-point  
 198 stochastic approximation scheme:

$$\hat{v}_{i,n} := (d_i/\varepsilon_n) u_i(\hat{x}_n) w_{i,n} \quad (\text{SPSA})$$

199 Importantly, the feasibility adjustment ensures that the perturbed action  $\hat{x}_n$  remains within the  
 200 players' action set  $\mathcal{X}$ , while preserving the direction of the original perturbation  $w_n$ . As we show in  
 201 [Appendix A](#), (SPSA) enjoys the bounds

$$\|\mathbb{E}[\hat{v}_n | \mathcal{F}_n] - v(x_n)\|_* = \mathcal{O}(\varepsilon_n) \quad \text{and} \quad \|\hat{v}_n\|_* = \mathcal{O}(1/\varepsilon_n). \quad (3)$$

202 With all these in hand, we are now ready to present the main contributions of this work.

### 203 3 Strategic robustness: Geometric and variational characterization

204 In this section, we address the strategic aspects of the equilibrium robustness question, and ask:

205 *Which equilibria remain equilibria after a small—but otherwise arbitrary—perturbation of the game?*

206 We take this desideratum as the starting point for our definition of *strategic robustness*, that is, action  
 207 profiles that remain (local) equilibria under small disturbances in the underlying game. This leads to  
 208 a delicate interplay between the variational and geometric aspects of the underlying game, which we  
 209 detail later in this section.

210 **3.1. A first approach and insights.** A natural way to measure the distance between two concave  
 211 games,  $\mathcal{G} \equiv \mathcal{G}(\mathcal{N}, \mathcal{X}, u)$  and  $\tilde{\mathcal{G}} \equiv \mathcal{G}(\mathcal{N}, \mathcal{X}, \tilde{u})$ , would be via the uniform distance

$$\rho(\mathcal{G}, \tilde{\mathcal{G}}) := \max_{i \in \mathcal{N}} \sup_{x \in \mathcal{X}} |u_i(x) - \tilde{u}_i(x)|. \quad (4)$$

212 Intuitively, if this quantity is small enough, the two games are nearly indistinguishable from a strategic  
 213 perspective, since for every strategy profile  $x \in \mathcal{X}$ , the payoffs in  $\mathcal{G}$  and  $\tilde{\mathcal{G}}$  are almost the same. Thus,  
 214 one might expect that at least some equilibria of  $\mathcal{G}$  would persist under sufficiently small perturbations,  
 215 especially since a Nash equilibrium appears to be a property of the payoff functions themselves.

<sup>2</sup>Since  $r_i > \varepsilon_n$ , we write  $x_{i,n}^\varepsilon = x_{i,n}(1 - \varepsilon_n/r_i) + (\varepsilon_n/r_i)p_i$  which is a convex combination of points in  $\mathcal{X}_i$ .  
 Regarding  $\hat{x}_{i,n}$ , note it can be written as  $\hat{x}_{i,n} = x_{i,n}(1 - \varepsilon_n/r_i) + (\varepsilon_n/r_i)(p_i + r_i w_{i,n})$ , which is also a convex  
 combination of points in  $\mathcal{X}_i$ . Thus, both belong to  $\mathcal{X}_i$ .

Surprisingly, as the next examples illustrate, this definition of distance *cannot* provide a meaningful concept of equilibrium robustness. Namely, for *any* game  $\mathcal{G}$  with equilibrium  $x^* \in \mathcal{X}$ , there exists a perturbed game  $\tilde{\mathcal{G}}$ , *arbitrarily close* to  $\mathcal{G}$  (in the  $\rho$ -metric) such that  $x^* \in \mathcal{X}$  is no longer an equilibrium of  $\tilde{\mathcal{G}}$ . To show this, we provide Examples 3.1 and 3.2 which together cover all possible types of equilibria in continuous games in the sense of (VI).

**Example 3.1.** Let  $\mathcal{G}$  be a continuous game, and  $x^* \in \mathcal{X}$  be an equilibrium point, such that  $\langle v_i(x^*), p_i - x_i^* \rangle < 0$  for some player  $i \in \mathcal{N}$  and  $p_i \in \mathcal{X}_i$ . For arbitrary  $\varepsilon > 0$ , define  $\tilde{u}_i : \mathcal{X} \rightarrow \mathbb{R}$  as

$$\tilde{u}_i(x) := u_i(x) - \varepsilon \exp\left(2\varepsilon^{-1}\langle v_i(x^*), x_i - x_i^* \rangle\right) \quad (5)$$

which is a continuously differentiable concave function in  $x_i$ , and let  $\tilde{u}_j \equiv u_j$  for all  $j \neq i, j \in \mathcal{N}$ . Since  $x^* \in \mathcal{X}$  is an equilibrium of  $\mathcal{G}$ , it holds  $\langle v_i(x^*), x_i - x_i^* \rangle \leq 0$  for all  $x_i \in \mathcal{X}_i$ , which implies that

$$\rho(\mathcal{G}, \tilde{\mathcal{G}}) = \sup_{x \in \mathcal{X}} |u_i(x) - \tilde{u}_i(x)| = \varepsilon \sup_{x_i \in \mathcal{X}_i} \exp(2\varepsilon^{-1}\langle v_i(x^*), x_i - x_i^* \rangle) = \varepsilon. \quad (6)$$

Computing the individual gradient vector of player  $i \in \mathcal{N}$ , we obtain

$$\tilde{v}_i(x) = v_i(x) - 2v_i(x^*) \exp\left(2\varepsilon^{-1}\langle v_i(x^*), x_i - x_i^* \rangle\right) \quad (7)$$

and, evaluating it at  $x^* \in \mathcal{X}$ , we get,  $\tilde{v}_i(x^*) = -v_i(x^*)$ . Therefore, for  $x = (p_i; x_{-i}^*) \in \mathcal{X}$ , we have

$$\langle \tilde{v}_i(x^*), x - x^* \rangle = -\langle v_i(x^*), p_i - x_i^* \rangle > 0 \quad (8)$$

i.e.,  $x^* \in \mathcal{X}$  is not an equilibrium point of the nearby game  $\tilde{\mathcal{G}}$ .  $\blacksquare$

**Example 3.2.** Let  $\mathcal{G}$  be a continuous game, and  $x^* \in \mathcal{X}$  an equilibrium point, such that  $\langle v(x^*), x - x^* \rangle = 0$  for all  $x \in \mathcal{X}$ . Fix a player  $i \in \mathcal{N}$  and  $p_i \in \mathcal{X}_i$ , and let  $y_i \in \mathcal{V}_i^*$  with  $\langle y_i, p_i - x_i^* \rangle > 0$ . For arbitrary  $\varepsilon > 0$ , let  $\tilde{u}_i : \mathcal{X} \rightarrow \mathbb{R}$  be defined as

$$\tilde{u}_i(x) := u_i(x) + \varepsilon \text{diam}(\mathcal{X}_i)^{-1} \|y_i\|_*^{-1} \langle y_i, x_i - x_i^* \rangle \quad (9)$$

which is a concave function in  $x_i$ , and  $\tilde{u}_j \equiv u_j$  for all  $j \neq i, j \in \mathcal{N}$ . Then, we readily get that

$$\rho(\mathcal{G}, \tilde{\mathcal{G}}) = \sup_{x \in \mathcal{X}} |u_i(x) - \tilde{u}_i(x)| = \varepsilon \text{diam}(\mathcal{X}_i)^{-1} \|y_i\|_*^{-1} \sup_{x_i \in \mathcal{X}_i} |\langle y_i, x_i - x_i^* \rangle| \leq \varepsilon. \quad (10)$$

Computing the individual gradient vector of player  $i \in \mathcal{N}$ , we obtain

$$\tilde{v}_i(x) = v_i(x) + \varepsilon \text{diam}(\mathcal{X}_i)^{-1} \|y_i\|_*^{-1} y_i \quad (11)$$

Therefore, for  $x = (p_i; x_{-i}^*) \in \mathcal{X}$ , it holds by the example's assumptions that

$$\langle \tilde{v}_i(x^*), x - x^* \rangle = \langle v_i(x^*), p_i - x_i^* \rangle + \varepsilon \text{diam}(\mathcal{X}_i)^{-1} \|y_i\|_*^{-1} \langle y_i, p_i - x_i^* \rangle > 0 \quad (12)$$

where we used that  $\langle v_i(x^*), p_i - x_i^* \rangle = 0$  and  $\langle y_i, p_i - x_i^* \rangle > 0$  by our assumptions. Thus,  $x^* \in \mathcal{X}$  is not an equilibrium of the perturbed game  $\tilde{\mathcal{G}}$ .  $\blacksquare$

**Remark 1.** In Examples 3.1 and 3.2, if  $\mathcal{G}$  is concave, so is  $\tilde{\mathcal{G}}$ , indicating that this notion of distance is not proper even within the class of concave games.

The preceding examples demonstrate that under the distance (4), even an arbitrarily small perturbation to the payoff function of a *single* player can destroy *any* equilibrium<sup>3</sup>. This phenomenon arises because, although an equilibrium is defined in terms of payoff functions, the first-order stationarity condition in (VI) shows that it fundamentally depends on the individual gradient vectors. Therefore, any meaningful notion of distance between two games must likewise be aware of the behavior of the individual gradient vectors.

**3.2. Defining the notion of strategic robustness.** As illustrated in Examples 3.1 and 3.2, small changes in the payoffs, though negligible in the uniform norm, can significantly alter the equilibrium landscape. To address this, we refine the notion of distance between games  $\mathcal{G}$  and  $\tilde{\mathcal{G}}$  as follows:

$$\text{dist}(\mathcal{G}, \tilde{\mathcal{G}}) := \sup_{x \in \mathcal{X}} \|v(x) - \tilde{v}(x)\|_* \quad (13)$$

With this definition in hand, we are now ready to state the concept of strategic robustness in the class of continuous games.

**Definition 1.** An equilibrium  $x^* \in \mathcal{X}$  of a game  $\mathcal{G}$  is called *strategically robust* if there exists  $\varepsilon > 0$  such that for *any* game  $\tilde{\mathcal{G}}$  with  $\text{dist}(\mathcal{G}, \tilde{\mathcal{G}}) < \varepsilon$ ,  $x^*$  is also an equilibrium of  $\tilde{\mathcal{G}}$ .

As we explore next, this definition offers a meaningful notion of “closeness” for equilibrium stability, one that is grounded not in the payoff values themselves, but in the geometry they induce.

<sup>3</sup>Such variations are not possible in the class of finite games, so, in this much more restrictive class, the sup-norm of the payoff differences is a valid metric

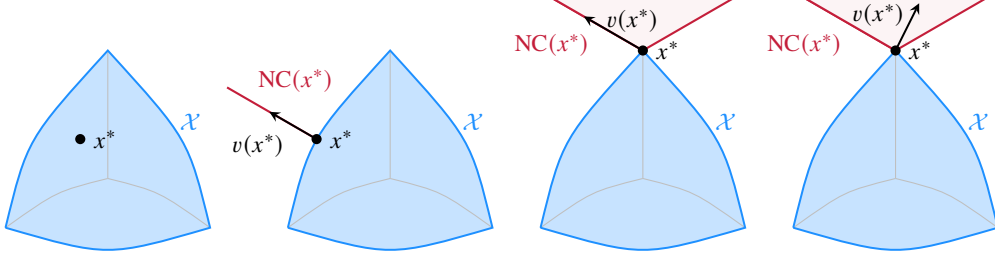

**Figure 1:** Different equilibrium configurations: an interior equilibrium ( $v(x^*) = 0$ ); a boundary, non-extreme equilibrium (normal cone with empty topological interior); an extreme, non-robust equilibrium ( $v(x^*)$  on the boundary of the normal cone); a robust equilibrium ( $v(x^*)$  in the interior of the normal cone). Only the robust equilibrium remains invariant under strategic perturbations of the underlying game.

**Geometric characterization.** To provide a geometric characterization, we zoom in on the variational structure that governs Nash equilibria. Specifically, we show that strategically robust equilibria  $x^* \in \mathcal{X}$  are precisely those solutions of (VI) for which the inequality is strict for all feasible deviations. Formally, we have the following characterization:

**Theorem 1.** *Let  $x^* \in \mathcal{X}$  be a joint action profile in  $\mathcal{G}(\mathcal{N}, \mathcal{X}, u)$ . Then the following are equivalent:*

- (i)  $x^*$  is a strategically robust equilibrium.
- (ii)  $\langle v(x^*), z \rangle \leq -m\|z\|$  for some  $m > 0$  and all  $z \in \text{TC}(x^*)$ , where  $\text{TC}(x^*)$  is the closure of all rays emanating from  $x^*$  and intersecting  $\mathcal{X}$  in at least one other point.
- (iii)  $v(x^*) \in \text{int}(\text{PC}(x^*))$ , where  $\text{PC}(x^*) := \{y \in \mathcal{Y} : \langle y, z \rangle \leq 0, \text{ for all } z \in \text{TC}(x^*)\}$ .

Intuitively, **Theorem 1** suggests that strategically robust equilibria are precisely the points  $x^* \in \mathcal{X}$  whose gradient vector  $v(x^*)$  lies in the topological interior of the polar cone  $\text{PC}(x^*)$ , i.e.,  $\langle v(x^*), z \rangle < 0$  for all  $z \in \text{TC}(x^*)$ . We, thus, conclude that strategic robustness can only occur at boundary points where the tangent cone is pointed; if the feasible set is locally flat at  $x^* \in \mathcal{X}$ , the corresponding polar cone has empty interior, and robustness is not possible. This phenomenon is illustrated in **Fig. 1**, and the full proof of **Theorem 1** is provided in **Appendix B**.

**Remark 2.** Both **Examples 3.1** and **3.2** violate the condition in **Definition 1**, but for different reasons. In the former case, although the perturbed payoffs can be made arbitrarily close to the original, the perturbed gradient vector at the equilibrium can become arbitrarily large, making the distance  $\text{dist}(\mathcal{G}, \tilde{\mathcal{G}})$  exceed any  $\varepsilon > 0$ . In the latter case, the polar cone  $\text{PC}(x^*)$  at the equilibrium has empty interior, so strategic robustness cannot hold at  $x^*$ .

In the next section, we examine the dynamic implications of this result by studying the robustness of such equilibria under (FTRL).

## 4 From strategic to dynamic robustness: Convergence results

So far, we focused on strategic robustness, a static notion determined solely by the underlying structure of the game and the local geometry around the equilibria. In this section, we shift to the dynamic perspective of our central question and explore which equilibria admit robust convergence guarantees, namely, equilibria that can emerge as stable outcomes of regularized learning under feedback uncertainty, regardless of the specific choice of regularizer.

To this end, we first establish that non-equilibrium points cannot arise as limit points of the (FTRL) dynamics, even under perfect gradient feedback. Formally, we have the following proposition, whose proof is provided in **Appendix C**.

**Proposition 1.** *Let  $x' \in \mathcal{X}$  be a non-equilibrium point of  $\mathcal{G}(\mathcal{N}, \mathcal{X}, u)$ . Then,  $x'$  cannot be a limit point of (FTRL) dynamics with  $\hat{v}_n \equiv v(x_n)$  for all  $n \in \mathbb{N}$ .*

Having excluded non-equilibrium points as positive probability outcomes of a learning process, we now turn to identifying equilibria that are robust from a dynamic standpoint, and more precisely,

under that of (FTRL). In this regard, strategically robust equilibria serve as natural candidates, as their stability with respect to game perturbations suggests they may also admit robust convergence guarantees. This is further supported by the finding that equilibrium points in the interior of the strategy space  $\mathcal{X}$  cannot be limit points: in particular, we show below that, even under i.i.d. stochastic noise, the iterates of (FTRL) diverge from such equilibria almost surely.

**Proposition 2.** *Let  $x^* \in \text{ri}(\mathcal{X})$  be a Nash equilibrium of  $\mathcal{G}(\mathcal{N}, \mathcal{X}, u)$ , and  $(x_n)_{n \in \mathbb{N}}$  be the sequence of play induced by (FTRL) with  $\hat{v}_n = v(x_n) + U_n$ , where  $U_n$  i.i.d. with  $\mathbb{E}[U_n] = 0$  and  $\text{cov}(U_n) \succ 0$  for all  $n \in \mathbb{N}$ . Then:*

$$\mathbb{P}\left(\lim_{n \rightarrow \infty} x_n = x^*\right) = 0 \quad \text{for any } x_1 \in \mathcal{X}_h. \quad (14)$$

**Remark 3.** The condition  $\text{cov}(U_n) \succ 0$  is not necessary. It suffices that  $\text{cov}(U_n)$  is non-degenerate in a direction  $p - x^*$  for  $p \in \mathcal{X}$ ; however, we state the stronger assumption for simplicity.

The key idea of the proof, which is deferred to [Appendix C](#), is that, since  $x^* \in \text{ri}(\mathcal{X})$ , we have  $\langle v(x^*), x - x^* \rangle = 0$  for all  $x \in \mathcal{X}$ . At the same time, as  $\text{cov}(U_n) \succ 0$ , the quantity  $\langle U_n, x - x^* \rangle$  fluctuates and remains bounded away from zero infinitely often, thereby preventing convergence.

**4.1. Learning with gradient-based feedback.** In view of the impossibility result of [Proposition 2](#), we shift our focus on the convergence of (FTRL) toward strategically robust equilibria. We first consider the gradient feedback model, where each player receives an unbiased estimate of their individual gradient vector via (SFO). Specifically, we analyze the behavior of (FTRL) and we establish local convergence guarantees toward strategically robust equilibria with high probability. This is encoded in the following theorem:

**Theorem 2.** *Let  $x^* \in \mathcal{X}$  be a strategically robust equilibrium of  $\mathcal{G}(\mathcal{N}, \mathcal{X}, u)$ . Fix a confidence level  $\delta > 0$ , and let  $(x_n)_{n \in \mathbb{N}}$  be the iterates of (FTRL) with feedback provided by (SFO), and step-size  $\gamma > 0$  sufficiently small. Then, there exists a neighborhood  $\mathcal{U}$  of  $x^*$  in  $\mathcal{X}_h$  such that:*

$$\mathbb{P}\left(\lim_{n \rightarrow \infty} x_n = x^*\right) \geq 1 - \delta \quad \text{if } x_1 \in \mathcal{U}. \quad (15)$$

Before proceeding, a few remarks are in order. Since continuous games may admit multiple Nash equilibria, global convergence guarantees are in general unattainable. As such, our analysis focuses on the local convergence landscape of (FTRL). As a sidenote, it is important to emphasize that the convergence result is robust to the choice of regularizer, relying solely on the general conditions outlined in [Section 2](#) rather than any particular functional form.

While our main focus lies on the qualitative convergence behavior of (FTRL), stronger guarantees can be obtained under additional structural assumptions on the strategy space and the regularizer. In particular, suppose that  $\mathcal{X}$  is a polyhedral domain of the form  $\mathcal{X} := \{x \in \mathbb{R}_+^d \mid Ax = b\}$  for some  $A \in \mathbb{R}^{m \times d}$  and  $b \in \mathbb{R}^m$ , and  $h$  is decomposable with kernel function  $\theta$ , i.e.,  $h$  can be written as  $h(x) = \sum_{j=1}^d \theta(x_j)$  for some continuous function  $\theta : \mathbb{R}_+ \rightarrow \mathbb{R}$  with locally Lipschitz  $\theta''$  and  $\theta'' > 0$ . Under these conditions, we obtain the explicit convergence rates for the (FTRL) dynamics, as follows.

**Theorem 3.** *If, in addition,  $\mathcal{X}$  is a polyhedral domain and  $h$  is decomposable with kernel  $\theta$ , on the event  $E := \{\lim_{n \rightarrow \infty} x_n = x^*\}$  it holds:*

$$\|x_n - x^*\| = \phi(-\Theta(n)) \quad (16)$$

where  $\phi$  is the rate function defined via

$$\phi(z) := \begin{cases} (\theta')^{-1}(z) & \text{if } z > \theta'(0^+) \\ 0 & \text{if } z \leq \theta'(0^+) \end{cases} \quad (17)$$

**Remark 4.** For the setting of [Example 2.2](#), with  $\mathcal{X} = \Delta(\mathcal{A})$ ,  $\theta(z) = z \log z$  and  $x^*$  a strict Nash equilibrium, the convergence rate of (FTRL) as per [Theorem 3](#), becomes  $\|x_n - x^*\| = \exp(-\Theta(n))$ .

**Remark 5.** For finite games, [\[16\]](#) showed that under a step-size schedule of the form  $\gamma_n \propto 1/n^p$ , the Robins-Monro summability conditions require  $p \in (1/2, 1]$ , leading to convergence rates from  $\phi(-\Theta(n^{1-p}))$  to  $\phi(-\Theta(\log n))$ .

329 **4.2. Learning with payoff-based feedback.** We now turn to the payoff-based feedback model,  
 330 where players observe only their realized payoffs and use them to estimate gradients indirectly via  
 331 (SPSA). This feedback model introduces higher variance and structural bias due to the diminishing  
 332 sampling radius and the feasibility corrections. Nevertheless, we show that strategically robust  
 333 equilibria retain their dynamic robustness: they still locally attract the (FTRL) dynamics with high  
 334 probability, as the following theorem suggests.

335 **Theorem 4.** *Let  $x^* \in \mathcal{X}$  be a strategically robust equilibrium of  $\mathcal{G}$ . Fix a confidence level  $\delta > 0$ , and*  
 336 *let  $(x_n)_{n \in \mathbb{N}}$  be the iterates of (FTRL) run with (SPSA) with  $\varepsilon_n \propto 1/n^p$  for some  $p \in (0, 1/2)$  and*  
 337 *step-size  $\gamma > 0$  sufficiently small. Then, there exists a neighborhood  $\mathcal{U}$  of  $x^*$  such that:*

$$\mathbb{P}\left(\lim_{n \rightarrow \infty} x_n = x^*\right) \geq 1 - \delta \quad \text{if } x_1 \in \mathcal{U}. \quad (18)$$

338 *If, in addition,  $\mathcal{X}$  is affinely constrained and  $h$  is decomposable with kernel  $\theta$ , then, whenever  $x_n$*   
 339 *converges to  $x^*$ , we have:*

$$\|x_n - x^*\| = \phi(-\Theta(n)). \quad (19)$$

340 Despite the scarcity of information inherent in the payoff-based feedback model, strategically robust  
 341 equilibria retain not only their convergence properties but also their convergence speed, under the  
 342 additional structural assumptions on the regularizer and domain, matching that of the (SFO) feedback  
 343 setting. This is further discussed along with the proof of the theorem in [Appendix C](#).

344 **4.3. Convergence landscape beyond strategic robustness.** Having established the robust conver-  
 345 gence properties of strategically robust equilibria, a natural question arises: *Can we expect robust*  
 346 *convergence guarantees toward equilibria that lack this structural property?* As we show below, the  
 347 answer is not encouraging: strategic robustness is essentially necessary for robust convergence.

348 To make this limitation precise, we move beyond the interior of the strategy space, where [Proposition 2](#)  
 349 rules out equilibria as potential limit points, and shift our focus to non-robust equilibria on the  
 350 boundary. To illustrate the behavior of (FTRL) in this setting, we construct a game with a unique  
 351 equilibrium that exhibits fundamentally different long-run behavior depending on the regularizer.

352 **Proposition 3.** *Consider the 1-player game  $\mathcal{G}$  with  $\mathcal{X} = [0, 1]$ ,  $u(x) = -\frac{3}{4}x^{4/3}$  and  $x^* = 0$ . Let*  
 353  *$(x_n)_{n \in \mathbb{N}}$  be the iterates of (FTRL) with  $\gamma < 1$ , and  $\hat{v}_n = v(x_n) + U_n$ , where  $U_n$  are i.i.d. standard*  
 354 *normal random variables for all  $n \in \mathbb{N}$ . Then, for any initial condition  $y_1 \in \mathbb{R}$ , we have:*

355 (i) *For  $h(x) = x \log x$ , it holds  $\mathbb{P}(\lim_{n \rightarrow \infty} x_n = x^*) = 0$ .*

356 (ii) *For  $h(x) = -2\sqrt{x}$ , it holds  $\mathbb{P}(\lim_{n \rightarrow \infty} x_n = x^*) = 1$ .*

357 The core idea of the proof of [Proposition 3](#) (which we present in detail in [Appendix C](#)) is to construct  
 358 a process  $z_n$  that dominates  $y_n$ . Importantly, the process  $z_n$  can be then viewed as a random walk  
 359 with a diminishing drift whose rate of decay depends on the choice of regularizer. Depending on  
 360 the magnitude of this drift, the process exhibits two sharply contrasting long-term behaviors: if the  
 361 drift decays sufficiently fast, the process behaves like a zero-mean random walk and returns infinitely  
 362 often with probability 1 (recurrence); conversely, if the drift diminishes at a slower rate, the process  
 363 behaves like a random walk with constant drift and escapes to infinity with probability 1 (transience).

364 In view of the above, we conclude that strategic robustness cannot be relaxed without compromising  
 365 convergence guarantees, even when the equilibrium lies on the boundary.

## 366 5 Concluding remarks

367 Our aim in this paper was to examine the robustness of Nash equilibria in continuous games, under  
 368 both strategic and dynamic uncertainty. From a strategic standpoint, we introduced the criterion of  
 369 *strategic robustness* as those (local) equilibria which remain invariant under small perturbations of the  
 370 underlying game, and we derived a tight geometric characterization thereof in terms of the variational  
 371 geometry of the game. From a dynamic standpoint, we focused on the stability of regularized learning  
 372 under uncertainty, and we established a deep structural connection between the two notions: strategic  
 373 robustness guarantees dynamic robustness under (FTRL), and this implication is essentially tight:  
 374 without strategic robustness, dynamic robustness cannot be ensured. To the best of our knowledge,  
 375 this is the first result of its kind in the context of continuous game, and we find it particularly appealing  
 376 for understanding the delicate interplay between the strategic and dynamic features of a game.

## 377 References

- 378 [1] Abernethy, J., Lee, C., and Tewari, A. Fighting bandits with a new kind of smoothness. In *NIPS '15: Proceedings of the 29th International Conference on Neural Information Processing Systems*, 2015.
- 379 [2] Arora, S., Hazan, E., and Kale, S. The multiplicative weights update method: A meta-algorithm and applications. *Theory of Computing*, 8(1):121–164, 2012.
- 380 [3] Arrow, K. J., Hurwicz, L., and Uzawa, H. *Studies in linear and non-linear programming*. Stanford University Press, 1958.
- 381 [4] Audibert, J.-Y., Bubeck, S., and Lugosi, G. Minimax policies for combinatorial prediction games. In *COLT '11: Proceedings of the 24th Annual Conference on Learning Theory*, 2011.
- 382 [5] Auer, P., Cesa-Bianchi, N., Freund, Y., and Schapire, R. E. Gambling in a rigged casino: The adversarial multi-armed bandit problem. In *Proceedings of the 36th Annual Symposium on Foundations of Computer Science*, 1995.
- 383 [6] Azizian, W., Iutzeler, F., Malick, J., and Mertikopoulos, P. On the rate of convergence of Bregman proximal methods in constrained variational inequalities. <http://arxiv.org/abs/2211.08043>, 2022.
- 384 [7] Beck, A. and Teboulle, M. Mirror descent and nonlinear projected subgradient methods for convex optimization. *Operations Research Letters*, 31(3):167–175, 2003.
- 385 [8] Benaïm, M. Dynamics of stochastic approximation algorithms. In Azéma, J., Émery, M., Ledoux, M., and Yor, M. (eds.), *Séminaire de Probabilités XXXIII*, volume 1709 of *Lecture Notes in Mathematics*, pp. 1–68. Springer Berlin Heidelberg, 1999.
- 386 [9] Billingsley, P. *Probability and measure*. A Wiley-Interscience publication. Wiley, 3. ed edition, 1995. ISBN 0471007102.
- 387 [10] Boone, V. and Mertikopoulos, P. The equivalence of dynamic and strategic stability under regularized learning in games. In *NeurIPS '23: Proceedings of the 37th International Conference on Neural Information Processing Systems*, 2023.
- 388 [11] Borkar, V. S. *Stochastic Approximation: A Dynamical Systems Viewpoint*. Cambridge University Press and Hindustan Book Agency, 2008.
- 389 [12] Bravo, M., Leslie, D. S., and Mertikopoulos, P. Bandit learning in concave  $N$ -person games. In *NeurIPS '18: Proceedings of the 32nd International Conference of Neural Information Processing Systems*, 2018.
- 390 [13] Debreu, G. A social equilibrium existence theorem. *Proceedings of the National Academy of Sciences of the USA*, October 1952.
- 391 [14] Flokas, L., Vlatakis-Gkaragkounis, E. V., Lianas, T., Mertikopoulos, P., and Piliouras, G. No-regret learning and mixed Nash equilibria: They do not mix. In *NeurIPS '20: Proceedings of the 34th International Conference on Neural Information Processing Systems*, 2020.
- 392 [15] Giannou, A., Vlatakis-Gkaragkounis, E. V., and Mertikopoulos, P. Survival of the strictest: Stable and unstable equilibria under regularized learning with partial information. In *COLT '21: Proceedings of the 34th Annual Conference on Learning Theory*, 2021.
- 393 [16] Giannou, A., Vlatakis-Gkaragkounis, E. V., and Mertikopoulos, P. The convergence rate of regularized learning in games: From bandits and uncertainty to optimism and beyond. In *NeurIPS '21: Proceedings of the 35th International Conference on Neural Information Processing Systems*, 2021.
- 394 [17] Hall, P. and Heyde, C. C. *Martingale Limit Theory and Its Application*. Probability and Mathematical Statistics. Academic Press, New York, 1980.
- 395 [18] Hofbauer, J. and Sigmund, K. Evolutionary game dynamics. *Bulletin of the American Mathematical Society*, 40(4), July 2003.
- 396 [19] Kivinen, J. and Warmuth, M. K. Exponentiated gradient versus gradient descent for linear predictors. *Information and Computation*, 132(1):1–63, 1997.
- 397 [20] Kohlberg, E. and Mertens, J.-F. On the strategic stability of equilibria. *Econometrica*, 54(5):1003–1037, September 1986.
- 398 [21] Kushner, H. J. and Clark, D. S. *Stochastic Approximation Methods for Constrained and Unconstrained Systems*. Springer, 1978.
- 399 [22] Lamperti, J. Criteria for the recurrence or transience of stochastic process. i. *Journal of Mathematical Analysis and Applications*, 1(3):314–330, 1960. ISSN 0022-247X. doi: [https://doi.org/10.1016/0022-247X\(60\)90005-6](https://doi.org/10.1016/0022-247X(60)90005-6). URL <https://www.sciencedirect.com/science/article/pii/0022247X60900056>.
- 400 [23] Lattimore, T. and Szepesvári, C. *Bandit Algorithms*. Cambridge University Press, Cambridge, UK, 2020.
- 401 [24] Littlestone, N. and Warmuth, M. K. The weighted majority algorithm. *Information and Computation*, 108(2):212–261, 1994.
- 402 [25] Mertikopoulos, P. and Zhou, Z. Learning in games with continuous action sets and unknown payoff functions. *Mathematical Programming*, 173(1-2):465–507, January 2019.

- 434 [26] Myerson, R. B. Refinements of the Nash equilibrium concept. *International Journal of Game Theory*, 7  
435 (2):73–80, 1978.
- 436 [27] Nesterov, Y. Primal-dual subgradient methods for convex problems. *Mathematical Programming*, 120(1):  
437 221–259, 2009.
- 438 [28] Ritzberger, K. and Weibull, J. W. Evolutionary selection in normal-form games. *Econometrica*, 63(6):  
439 1371–99, November 1995.
- 440 [29] Rockafellar, R. T. *Convex Analysis*. Princeton University Press, Princeton, NJ, 1970.
- 441 [30] Rockafellar, R. T. and Wets, R. J. B. *Variational Analysis*, volume 317 of *A Series of Comprehensive*  
442 *Studies in Mathematics*. Springer-Verlag, Berlin, 1998.
- 443 [31] Rosen, J. B. Existence and uniqueness of equilibrium points for concave  $N$ -person games. *Econometrica*,  
444 33(3):520–534, 1965.
- 445 [32] Selten, R. Re-examination of the perfectness concept for equilibrium points in extensive games. *Interna-*  
446 *tional Journal of Game Theory*, 4:25–55, 1975.
- 447 [33] Shalev-Shwartz, S. *Online learning: Theory, algorithms, and applications*. PhD thesis, Hebrew University  
448 of Jerusalem, 2007.
- 449 [34] Shalev-Shwartz, S. Online learning and online convex optimization. *Foundations and Trends in Machine*  
450 *Learning*, 4(2), 2011.
- 451 [35] Shalev-Shwartz, S. and Singer, Y. Convex repeated games and Fenchel duality. In *NIPS' 06: Proceedings*  
452 *of the 19th Annual Conference on Neural Information Processing Systems*. MIT Press, 2006.
- 453 [36] Spall, J. C. Multivariate stochastic approximation using a simultaneous perturbation gradient approximation.  
454 *IEEE Trans. Autom. Control*, 37(3):332–341, March 1992.
- 455 [37] Tsuda, K., Rätsch, G., and Warmuth, M. K. Matrix exponentiated gradient updates for on-line Bregman  
456 projection. *Journal of Machine Learning Research*, 6:995–1018, 2005.
- 457 [38] van Damme, E. *Stability and perfection of Nash equilibria*. Springer-Verlag, Berlin, 1987.
- 458 [39] von Neumann, J. and Morgenstern, O. *Theory of Games and Economic Behavior*. Princeton University  
459 Press, 1944.
- 460 [40] Vovk, V. G. Aggregating strategies. In *COLT '90: Proceedings of the 3rd Workshop on Computational*  
461 *Learning Theory*, pp. 371–383, 1990.
- 462 [41] Wu, W.-T. and Jiang, J.-H. Essential equilibrium points of  $N$ -person non-cooperative games. *Scientia*  
463 *Sinica*, 11(10):1307–1322, 1962.
- 464 [42] Xiao, L. Dual averaging methods for regularized stochastic learning and online optimization. *Journal of*  
465 *Machine Learning Research*, 11:2543–2596, October 2010.
- 466 [43] Zimmert, J. and Seldin, Y. Tsallis-INF: An optimal algorithm for stochastic and adversarial bandits.  
467 *Journal of Machine Learning Research*, 22(28):1–49, 2021.
- 468 [44] Zinkevich, M. Online convex programming and generalized infinitesimal gradient ascent. In *ICML '03:*  
469 *Proceedings of the 20th International Conference on Machine Learning*, pp. 928–936, 2003.

## A Auxiliary results

As a preamble to our analysis, we provide some basic properties of the regularizers and the mirror maps, and present some auxiliary results from martingale theory and Markov processes that we will use throughout the sequel.

**A.1. Mirror maps and results from convex analysis.** In this section, we provide a more detailed discussion of key notions from convex analysis, including mirror maps and regularizers.

To begin, let  $(\mathcal{V}, \|\cdot\|)$  be a finite-dimensional normed vector space. Its dual space is denoted by  $(\mathcal{V}^*, \|\cdot\|_*)$ , where the dual norm is defined as

$$\|y\|_* \equiv \max\{\langle y, x \rangle : \|x\| \leq 1\}, \quad (\text{A.1})$$

and  $\langle y, x \rangle$  denotes the canonical pairing between  $y \in \mathcal{V}^*$  and  $x \in \mathcal{V}$ . To maintain consistency with the notation used throughout the paper, we will refer to  $\mathcal{V}^*$  as  $\mathcal{Y}$  from this point onward.

Given a closed convex set  $\mathcal{X} \subseteq \mathcal{V}$  and a point  $p \in \mathcal{X}$ , we define the tangent cone  $\text{TC}(p)$  and the polar cone  $\text{PC}(p)$  as follows:

$$\text{TC}(p) = \text{cl}\{z \in \mathcal{V} : p + tz \in \mathcal{X} \text{ for some } t > 0\} \quad (\text{A.2})$$

and

$$\text{PC}(p) = \{y \in \mathcal{Y} : \langle y, z \rangle \leq 0, \text{ for all } z \in \text{TC}(p)\} \quad (\text{A.3})$$

For a strongly convex regularizer  $h : \mathcal{X} \rightarrow \mathbb{R}$ , the *subdifferential* of  $h$  at  $x \in \mathcal{X}$  is defined as

$$\partial h(x) := \{y \in \mathcal{Y} : h(x') \geq h(x) + \langle y, x' - x \rangle \text{ for all } x' \in \mathcal{X}\} \quad (\text{A.4})$$

and we denote the *domain of subdifferentiability* of  $h$  as

$$\mathcal{X}_h = \{x \in \mathcal{X} : \partial h(x) \neq \emptyset\}. \quad (\text{A.5})$$

In addition, the mirror map  $Q$ , defined via

$$Q(y) = \arg \max_{x \in \mathcal{X}} \{\langle y, x \rangle - h(x)\} \quad (\text{A.6})$$

is single-valued on  $\mathcal{Y}$ , since the maximization problem admits a unique solution, as  $h$  is strongly convex. Finally, by the optimality conditions of (A.6), we get that

$$x = Q(y) \quad \text{if and only if} \quad y \in \partial h(x). \quad (\text{A.7})$$

since  $0 \in y - \partial h(x)$ . This readily implies that  $\mathcal{X}_h = \text{im } Q$ . In general, we have

$$\text{ri}(\mathcal{X}) \subseteq \mathcal{X}_h \subseteq \mathcal{X}, \quad (\text{A.8})$$

where the first inclusion follows from standard results on the subdifferentiability of convex functions [29, Chap. 26], whereas the second is immediate from the definition of  $\mathcal{X}_h$ . This leads to two contrasting regimes: (i)  $\mathcal{X}_h = \text{ri}(\mathcal{X})$ , in which case  $h$  is called *steep*; and (ii)  $\mathcal{X}_h = \mathcal{X}$ , in which case  $h$  is called *non-steep*.

Finally, we include here for future reference an elementary result concerning solid (convex) cones.

**Lemma A.1.** *Let  $\mathcal{K}$  be a convex cone in  $\mathbb{R}^d$  with nonempty topological interior, and let  $z \in \text{int}(\mathcal{K})$ . Then there exists a finitely generated cone  $\mathcal{K}'$  such that  $z \in \text{int } \mathcal{K}' \subseteq \text{int } \mathcal{K}$ .*

*Remark.* We stress here that, by  $\text{int } \mathcal{K}$  we mean the topological interior of  $\mathcal{K}$  (which is nonempty by assumption), not the relative interior  $\text{ri } \mathcal{K}$  thereof (whis is always nonempty).

*Proof.* Since  $\mathcal{K}$  is closed and  $z \in \text{int } \mathcal{K}$ , there exists a closed ball  $\mathcal{B}$  centered at  $z$ , which is entirely contained in  $\text{int } \mathcal{K}$  (an immediate consequence of the fact that  $z$  is well-separated from the boundary  $\text{bd } \mathcal{K}$  of  $\mathcal{K}$ ). Since  $\mathcal{B}$  is not contained in any lower-dimensional subspace of  $\mathbb{R}^d$ , it is possible to find inductively  $d$  linearly independent vectors  $z_1, \dots, z_d \in \mathcal{B}$  on the boundary  $\text{bd } \mathcal{B}$  of  $\mathcal{B}$  such that  $z$  is contained in the convex hull  $\Delta(z_1, \dots, z_d)$  (and, in particular, in the relative interior thereof). Thus, letting  $\mathcal{K}' \equiv \mathcal{K}(z_1, \dots, z_d)$  be the polyhedral cone generated by  $z_1, \dots, z_d$ , we have  $\mathcal{K}' \subseteq \mathcal{K}$  and  $z \in \text{int } \mathcal{K}'$  by construction, and our proof is complete. ■

505 **A.2. Statistical bounds and results from probability theory.** In this section, we provide some  
 506 basic statistical bounds for (SPSA), and we present some results that we will use freely in the sequel.  
 507 We start with our bounds for (SPSA), specifically:

508 **Proposition A.1.** *The estimator (SPSA) enjoys the following bounds:*

$$\|\mathbb{E}[\hat{v}_n | \mathcal{F}_n] - v(x_n)\|_* = \mathcal{O}(\varepsilon_n) \quad \text{and} \quad \|\hat{v}_n\|_* = \mathcal{O}(1/\varepsilon_n). \quad (\text{A.9})$$

509 *Proof.* Letting  $\zeta_n := \varepsilon_n(w_n + (p - x_n)/r)$ , we write  $\hat{x}_n = x_n + \zeta_n$ , and we have for player  $i \in \mathcal{N}$ :

$$u_i(\hat{x}_n)w_{i,n} = u_i(x_n)w_{i,n} + \langle \nabla u_i(x_n), \zeta_n \rangle w_{i,n} + \int_0^1 \langle \nabla u_i(x_n + \tau \zeta_n) - \nabla u_i(x_n), \zeta_n \rangle d\tau w_{i,n} \quad (\text{A.10})$$

510 Now, the middle term can be unfolded as

$$\langle \nabla u_i(x_n), \zeta_n \rangle w_{i,n} = \langle \nabla u_i(x_n), \zeta_{i,n} \rangle w_{i,n} + \sum_{j \neq i} \langle \nabla_j u_i(x_n), \zeta_{j,n} \rangle w_{i,n} \quad (\text{A.11})$$

511 and, noting that  $\mathbb{E}[w_{i,n} | \mathcal{F}_n] = 0$ , we take conditional expectation, and we get:

$$\mathbb{E}[\langle \nabla u_i(x_n), \zeta_n \rangle w_{i,n} | \mathcal{F}_n] = \varepsilon_n \mathbb{E}[\langle \nabla u_i(x_n), w_{i,n} \rangle w_{i,n} | \mathcal{F}_n] = (\varepsilon_n/d_i) v_i(x_n) \quad (\text{A.12})$$

512 and

$$\mathbb{E}[u_i(x_n)w_{i,n} | \mathcal{F}_n] = 0 \quad (\text{A.13})$$

513 Therefore, we have:

$$\|\mathbb{E}[\hat{v}_{i,n} | \mathcal{F}_n] - v_i(x_n)\| = \left\| \mathbb{E} \left[ \int_0^1 \langle \nabla u_i(x_n + \tau \zeta_n) - \nabla u_i(x_n), \zeta_n \rangle d\tau w_{i,n} \middle| \mathcal{F}_n \right] \right\| = \mathcal{O}(\varepsilon_n) \quad (\text{A.14})$$

514 Now, for the second bound, since  $u_i$  is continuous on a compact domain, it is bounded, and we readily  
 515 get that:

$$\|\hat{v}_{i,n}\|_* = \mathcal{O}(1/\varepsilon_n) \quad (\text{A.15})$$

516 ■

517 Moving forward, we provide some useful results from probability theory. The first two statements  
 518 below are adapted from the classical textbook of Hall & Heyde [17], while the third one is a simplified  
 519 version of [22, Theorem 3.2] on the recurrence of a nonnegative Markov process with diminishing  
 520 drift. Namely, we have:

521 **Theorem A.1.** (Doob's maximal inequality, [17, Corollary 2.1]) *If  $S_n$  is a martingale, we have:*

$$\mathbb{P} \left( \sup_{k \leq n} |S_k| > t \right) \leq \frac{\mathbb{E}[|S_n|]}{t} \quad \text{for all } t > 0. \quad (\text{A.16})$$

522 **Theorem A.2.** (Burkholder's inequality, [17, Theorem 2.10]) *Let  $S_n := \sum_{k=1}^n D_k$ , where  $(D_k)_{k \in \mathbb{N}}$  is  
 523 a martingale difference sequence, and let  $q \in (1, \infty)$ . Then, there exists a constant  $C$  that depends  
 524 only on  $q$  such that:*

$$\mathbb{E}[|S_n|^q] \leq C \mathbb{E} \left[ \left| \sum_{k=1}^n D_k^2 \right|^{q/2} \right] \quad (\text{A.17})$$

525 **Theorem A.3.** (Lamperti [22, Theorem 3.2]) *Let the non-negative stochastic process  $(x_n)_{n \in \mathbb{N}}$  be  
 526 defined as*

$$x_{n+1} = (x_n + f(x_n) + \xi_n)^+ \quad (\text{A.18})$$

527 *for some  $x \mapsto f(x)$  bounded measurable function, and  $\xi_n$  i.i.d. with  $\mathbb{E}[\xi_n] = 0$ ,  $\mathbb{V}(\xi_n) = \sigma^2 \neq 0$  and  
 528 finite  $2 + \varepsilon$  moment for some  $\varepsilon > 0$ . Then:*

529 (i) *if  $f(x) \leq \sigma^2/2x$  for all  $x$  large enough, the process is recurrent in the sense there exists  $c < \infty$   
 530 such that*

$$\mathbb{P} \left( \liminf_{n \rightarrow \infty} x_n \leq c \right) = 1 \quad (\text{A.19})$$

531 (ii) *if  $f(x) \geq \theta \sigma^2/2x$  for some  $\theta > 1$  and all  $x$  large enough, the process is transient in the sense  
 532 that*

$$\mathbb{P} \left( \lim_{n \rightarrow \infty} x_n = \infty \right) = 1 \quad (\text{A.20})$$

## B Analysis and results for strategic robustness

Our aim in this appendix is to provide a detailed proof for [Theorem 1](#), which we restate below for convenience.

**Theorem 1.** *Let  $x^* \in \mathcal{X}$  be a joint action profile in  $\mathcal{G}(\mathcal{N}, \mathcal{X}, u)$ . Then the following are equivalent:*

(i)  $x^*$  is a strategically robust equilibrium.

(ii)  $\langle v(x^*), z \rangle \leq -m\|z\|$  for some  $m > 0$  and all  $z \in \text{TC}(x^*)$ , where  $\text{TC}(x^*)$  is the closure of all rays emanating from  $x^*$  and intersecting  $\mathcal{X}$  in at least one other point.

(iii)  $v(x^*) \in \text{int}(\text{PC}(x^*))$ , where  $\text{PC}(x^*) := \{y \in \mathcal{Y} : \langle y, z \rangle \leq 0, \text{ for all } z \in \text{TC}(x^*)\}$ .

*Proof.* We will go full-circle by showing (i)  $\implies$  (ii)  $\implies$  (iii)  $\implies$  (i).

(i)  $\implies$  (ii). Suppose that  $x^* \in \mathcal{X}$  is a strategically robust equilibrium, and let  $\varepsilon > 0$  be such that  $x^*$  is an equilibrium of any  $\tilde{\mathcal{G}}$  with  $\text{dist}(\mathcal{G}, \tilde{\mathcal{G}}) \leq \varepsilon$ .

For the sake of contradiction, suppose that there exists  $z \neq 0, z \in \text{TC}(x^*)$  such that

$$\langle v(x^*), z \rangle = 0. \quad (\text{B.1})$$

which readily implies that there exists player  $i \in \mathcal{N}$  and  $z_i \neq 0, z_i \in \text{TC}_i(x_i^*)$ , such that

$$\langle v_i(x^*), z_i \rangle = 0. \quad (\text{B.2})$$

Fix some  $y_i \in \mathcal{Y}_i$  such that  $\langle y_i, z_i \rangle > 0$ , and let  $y \equiv (y_1, \dots, y_N) \in \mathcal{Y}$  with  $y_j \equiv 0$  for  $j \neq i, j \in \mathcal{N}$ . Using (B.1) and the definition of  $y$ , we get that  $\langle v(x^*) + \varepsilon\|y\|_*^{-1}y, z \rangle > 0$ , and therefore, there exists  $p \in \mathcal{X}$  such that:

$$\langle v(x^*) + \varepsilon\|y\|_*^{-1}y, p - x^* \rangle > 0 \quad (\text{B.3})$$

Now, define the game  $\tilde{\mathcal{G}}$  with payoff functions

$$\tilde{u}_i(x) := u_i(x) + \varepsilon\|y\|_*^{-1}\langle y_i, x_i - x_i^* \rangle \quad (\text{B.4})$$

and  $\tilde{u}_j \equiv u_j$  for all  $j \in \mathcal{N}, j \neq i$ . Then, the individual gradient vector of player  $i \in \mathcal{N}$  is given by

$$\tilde{v}_i(x) = v_i(x) + \varepsilon\|y\|_*^{-1}y_i \quad (\text{B.5})$$

and the distance between  $\mathcal{G}$  and  $\tilde{\mathcal{G}}$  is equal to

$$\text{dist}(\mathcal{G}, \tilde{\mathcal{G}}) = \sup_{x \in \mathcal{X}} \|v(x) - \tilde{v}(x)\|_* = \varepsilon\|y\|_*^{-1}\|y\|_* = \varepsilon. \quad (\text{B.6})$$

Finally, we conclude that  $x^* \in \mathcal{X}$  is not an equilibrium of  $\tilde{\mathcal{G}}$ , since for  $p \in \mathcal{X}$  as above, we have

$$\langle \tilde{v}(x^*), p - x^* \rangle = \langle v(x^*) + \varepsilon\|y\|_*^{-1}y, p - x^* \rangle > 0 \quad (\text{B.7})$$

where the last inequality holds by (B.3). Thus, we arrive at a contradiction, i.e.,  $\langle v(x^*), z \rangle < 0$  for all  $z \neq 0, z \in \text{TC}(x^*)$ . Finally, since  $\{z \in \mathcal{Y} : z \in \text{TC}(x^*), \|z\| = 1\}$  is compact, we readily obtain

$$\sup\{\langle v(x^*), z \rangle : z \in \text{TC}(x^*), \|z\| = 1\} \leq -m \quad (\text{B.8})$$

for some  $m > 0$ . Therefore, for all  $z \in \text{TC}(x^*)$ , we have:

$$\langle v(x^*), z \rangle \leq -m\|z\| \quad (\text{B.9})$$

as was to be shown.

(ii)  $\implies$  (iii). First, note that the  $\|\cdot\|_*$ -ball of radius  $\varepsilon > 0$  centered at  $v(x^*)$  can be written as:

$$\mathbb{B}_\varepsilon(v(x^*)) = v(x^*) + \varepsilon\mathbb{B}_1(0) \quad (\text{B.10})$$

where  $\mathbb{B}_\varepsilon(y) := \{y' \in \mathcal{Y} : \|y' - y\|_* \leq \varepsilon\}$  for  $y \in \mathcal{Y}$ . Now, take any  $y \in \mathbb{B}_1(0)$  and  $z \in \text{TC}(x^*)$ . Then, for  $\varepsilon > 0$  we have

$$\begin{aligned} \langle v(x^*) + \varepsilon y, z \rangle &= \langle v(x^*), z \rangle + \varepsilon\langle y, z \rangle \\ &\leq -m\|z\| + \varepsilon\|y\|_*\|z\| \\ &\leq -(m - \varepsilon)\|z\| \end{aligned} \quad (\text{B.11})$$

Setting  $\varepsilon = m/2$ , we have for all  $z \in \text{TC}(x^*)$

$$\langle v(x^*) + (m/2)y, z \rangle < -(m/2)\|z\| \quad (\text{B.12})$$

which implies that  $v(x^*) + (m/2)y \in \text{PC}(x^*)$ . Thus, we readily get that  $\mathbb{B}_{m/2}(v(x^*)) \subseteq \text{PC}(x^*)$ , i.e.,  $v(x^*) \in \text{int}(\text{PC}(x^*))$ .

(iii)  $\implies$  (i). Suppose that  $v(x^*) \in \text{int}(\text{PC}(x^*))$ . First, it directly implies that  $\langle v(x^*), z \rangle \leq 0$ , for all  $z \in \text{TC}(x^*)$ , i.e.,  $x^*$  is an equilibrium of  $\mathcal{G}$ . In addition, there exists  $\varepsilon > 0$  such that  $\mathbb{B}_\varepsilon(v(x^*)) \subseteq \text{PC}(x^*)$ . Therefore, for any game  $\tilde{\mathcal{G}}$  with  $\text{dist}(\mathcal{G}, \tilde{\mathcal{G}}) < \varepsilon$ , we immediately get that  $\tilde{v}(x^*) \in \text{PC}(x^*)$ , which implies that  $x^* \in \mathcal{X}$  is an equilibrium of  $\tilde{\mathcal{G}}$ . Thus,  $x^*$  is strategically robust, and our proof is complete. ■

## C Analysis and results for dynamic robustness

In this appendix, we provide detailed proofs of the statements presented in Section 4, along with several intermediate results that will serve as key building blocks.

**C.1. Intermediate results.** We begin this section with two results establishing sufficient conditions for convergence, followed by a high-probability deviation bound for martingales. We conclude with a variant of Farkas' Lemma, which will be instrumental in deriving convergence rates.

**Proposition C.1.** *Let  $x^* \in \mathcal{X}$  and  $\mathcal{Z} := \{z_1, \dots, z_m\} \subseteq \mathcal{V}$  be a set of unit vectors, such that any  $z \in \text{TC}(x^*)$  can be written as  $z = \sum_{j=1}^m \lambda_j z_j$  for some  $\lambda_j \geq 0$ . If  $\lim_{n \rightarrow \infty} \langle y_n, z_j \rangle = -\infty$  for all  $z_j \in \mathcal{Z}$ , then  $\lim_{n \rightarrow \infty} Q(y_n) = x^*$ .*

*Proof.* Denote  $Q(y_n)$  by  $x_n$ , and suppose that  $\limsup_{n \rightarrow \infty} \|x_n - x^*\| > 0$ . Then, there exists a subsequence  $(x_{n_k})_{k \in \mathbb{N}}$  such that  $\|x_{n_k} - x^*\|$  stays bounded away from zero, i.e.,  $\|x_{n_k} - x^*\| \geq c$  for some  $c > 0$  and all  $k \in \mathbb{N}$ . Since  $y_{n_k} \in \partial h(x_{n_k})$ , we readily get for  $z_{n_k} = (x_{n_k} - x^*)/\|x_{n_k} - x^*\|$ :

$$\begin{aligned} h(x^*) &\geq h(x_{n_k}) + \langle y_{n_k}, x^* - x_{n_k} \rangle \\ &= h(x_{n_k}) - \langle y_{n_k}, z_{n_k} \rangle \|x_{n_k} - x^*\| \\ &\geq \min h - \langle y_{n_k}, z_{n_k} \rangle \|x_{n_k} - x^*\|. \end{aligned} \quad (\text{C.1})$$

Now, we have  $z_{n_k} \in \text{TC}(x^*)$ , and by assumption,  $z_{n_k} = \sum_{j=1}^m \lambda_{j,k} z_j$  for some coefficients  $\lambda_{j,k} \geq 0$ . Therefore, the above inequality can be written as:

$$h(x^*) \geq \min h - \|x_{n_k} - x^*\| \sum_{j=1}^m \lambda_{j,k} \langle y_{n_k}, z_j \rangle \quad (\text{C.2})$$

$$\geq \min h - \left( \max_{j'} \langle y_{n_k}, z_{j'} \rangle \right) \|x_{n_k} - x^*\| \sum_{j=1}^m \lambda_{j,k} \quad (\text{C.3})$$

Now, note that by the definition of  $z_{n_k}$ , we have  $\|z_{n_k}\| = 1$ , and, thus:

$$1 = \|z_{n_k}\| = \left\| \sum_{j=1}^m \lambda_{j,k} z_j \right\| \leq \sum_{j=1}^m \lambda_{j,k} \|z_j\| = \sum_{j=1}^m \lambda_{j,k} \quad (\text{C.4})$$

where we used that  $\|z_j\| = 1$  for all  $j$ . Now, since  $\lim_{n \rightarrow \infty} \langle y_n, z_j \rangle = -\infty$  for all  $z_j \in \mathcal{Z}$ , it readily implies that

$$\lim_{n \rightarrow \infty} \max_{j'} \langle y_n, z_{j'} \rangle = -\infty \quad (\text{C.5})$$

Therefore, for all  $k$  large enough, we have  $-\max_{j'} \langle y_{n_k}, z_{j'} \rangle > 0$ , and, using that  $\sum_{j=1}^m \lambda_{j,k} \geq 1$  and  $\|x_{n_k} - x^*\| \geq c$  for all  $k \in \mathbb{N}$ , we obtain:

$$h(x^*) \geq \min h + \left( -\max_{j'} \langle y_{n_k}, z_{j'} \rangle \right) \|x_{n_k} - x^*\| \sum_{j=1}^m \lambda_{j,k} \quad (\text{C.6})$$

$$\geq \min h - c \max_{j'} \langle y_{n_k}, z_{j'} \rangle \quad (\text{C.7})$$

Finally, letting  $k \rightarrow \infty$ , we get that  $h(x^*) \geq \infty$ , which is a contradiction. Thus, the result follows. ■

Finally, using the above proposition, we establish the following corollary.

**Corollary C.1.** *Let  $\mathcal{W}(M) := \{y \in \mathcal{Y} : \max_{z \in \mathcal{Z}} \langle y, z \rangle < -M\}$  for  $M > 0$ . Then, for any  $\varepsilon > 0$ , there exists  $M_\varepsilon > 0$  such that for all  $y \in \mathcal{W}(M_\varepsilon)$  it holds  $\|x^* - Q(y)\| < \varepsilon$ .*

591 *Proof.* Suppose it does not hold. Then, there exists  $\varepsilon > 0$  such that for any  $n \in \mathbb{N}$ , one can find  
 592  $y_n \in \mathcal{Y}$  such that  $\max_{z \in \mathcal{Z}} \langle y_n, z \rangle < -n$  and  $\|x^* - Q(y_n)\| \geq \varepsilon$ . Taking  $n \rightarrow \infty$  leads to a contradiction  
 593 with [Proposition C.1](#). ■

594 **Lemma C.1.** Let  $S_n := \gamma \sum_{k=1}^n \xi_k$  be a martingale with respect to a filtration  $(\mathcal{F}_n)_{n \in \mathbb{N}}$  such that  
 595  $\mathbb{E}[|\xi_n|^q] \leq \sigma_n^q$  for all  $n \in \mathbb{N}$  and some  $q \geq 2$ . Then, for any  $\mu \in (0, 1)$  and  $c > 0$ , it holds:

$$\mathbb{P}\left(\sup_{\ell \leq n} |S_\ell| > c(\gamma n)^\mu\right) \leq C_q \frac{\gamma^{q(1-\mu)} \sum_{k=1}^n \sigma_k^q}{n^{1+q(\mu-1/2)}} \quad (\text{C.8})$$

596 where  $C_q$  is a constant that depends only on  $c$  and  $q$ .

597 *Proof.* To bound the maximum absolute deviation of  $S_n$ , we apply Doob's maximal inequality (see  
 598 [Theorem A.1](#)), and obtain:

$$\mathbb{P}\left(\sup_{\ell \leq n} |S_\ell| > c(\gamma n)^\mu\right) \leq \frac{\mathbb{E}[|S_n|^q]}{c^q (\gamma n)^{q\mu}} \quad (\text{C.9})$$

599 Now, we invoke Burkholder's inequality (see [Theorem A.2](#)), from which we get:

$$\mathbb{E}[|S_n|^q] \leq C'_q \mathbb{E}\left[\left(\sum_{k=1}^n \gamma^2 |\xi_k|^2\right)^{q/2}\right] \leq C'_q \gamma^q \mathbb{E}\left[\left(\sum_{k=1}^n |\xi_k|^2\right)^{q/2}\right] \quad (\text{C.10})$$

600 where  $C_q$  is a constant that depends only on  $q$ . Since  $q \geq 2$ , applying Jensen's inequality, we obtain:

$$\left(\frac{1}{n} \sum_{k=1}^n |\xi_k|^2\right)^{q/2} \leq \frac{1}{n} \left(\sum_{k=1}^n |\xi_k|^q\right) \quad (\text{C.11})$$

601 and, therefore,

$$\mathbb{E}\left[\left(\sum_{k=1}^n |\xi_k|^2\right)^{q/2}\right] \leq n^{q/2-1} \mathbb{E}\left[\sum_{k=1}^n |\xi_k|^q\right] \quad (\text{C.12})$$

$$\leq n^{q/2-1} \sum_{k=1}^n \sigma_k^q \quad (\text{C.13})$$

602 Thus, combining the above with (C.9) and (C.10), we obtain:

$$\mathbb{P}\left(\sup_{\ell \leq n} |S_\ell| > c(\gamma n)^\mu\right) \leq \frac{C'_q \gamma^q n^{q/2-1} \sum_{k=1}^n \sigma_k^q}{c^q (\gamma n)^{q\mu}} \quad (\text{C.14})$$

$$\leq C_q \frac{\gamma^{q(1-\mu)} \sum_{k=1}^n \sigma_k^q}{n^{1+q(\mu-1/2)}} \quad (\text{C.15})$$

603 for  $C_q \equiv C'_q/c^q$ , and the proof is complete. ■

604 We finally provide a separation result in the spirit of Farkas' lemma, that we will need for establishing  
 605 the convergence rates.

606 **Lemma C.2.** Let  $\mathcal{X} = \{x \in \mathcal{V} : Ax = b, x \geq 0\}$  for  $A \in \mathbb{R}^{m \times d}$ ,  $b \in \mathbb{R}^d$ . Then, for all  $x^* \in \mathcal{X}$  with  
 607  $\text{act}(x^*) := \{\beta \in \{1, \dots, d\} : x_\beta^* = 0\}$ , there exists  $P \equiv P(x^*) \geq 1$  such that for all  $\mathcal{I} \subseteq \text{act}(x^*)$  at least  
 608 one of the following is true:

- 609 (i)  $\mathcal{I} \neq \emptyset$  and there exists  $\beta \in \text{act}(x^*) \setminus \mathcal{I}$  such that  $x_\beta \leq P \max\{x_\alpha : \alpha \in \mathcal{I}\}$  for all  $x \in \mathcal{X}$ .
- 610 (ii) There exists  $z \in \ker(A)$  such that  $\|z\| \leq P$ ,  $z_\beta = 0$  for  $\beta \in \mathcal{I}$  and  $1 \leq z_\beta \leq P$  for  $\beta \in \text{act}(x^*) \setminus \mathcal{I}$ .  
 611 Then, there exists

612 *Proof.* For the proof, see Azizian et al. [\[6, Lemma 6\]](#). ■

613 **C.2. Main results of Section 4.** With the necessary tools in place, we proceed to prove the main  
 614 results stated in Section 4. We start with the first result, establishing that a non-equilibrium point  
 615 cannot arise as a limit point of the sequence of play induced by (FTRL).

616 **Proposition 1.** *Let  $x' \in \mathcal{X}$  be a non-equilibrium point of  $\mathcal{G}(\mathcal{N}, \mathcal{X}, u)$ . Then,  $x'$  cannot be a limit*  
 617 *point of (FTRL) dynamics with  $\hat{v}_n \equiv v(x_n)$  for all  $n \in \mathbb{N}$ .*

618 *Proof.* Since  $x'$  is not an equilibrium, there exists  $p \in \mathcal{X}$  with  $\langle v(x'), p - x' \rangle > 0$ . Therefore, by  
 619 continuity of the function  $x \mapsto \langle v(x), p - x \rangle$ , there exists a neighborhood  $\mathcal{U}$  of  $x'$  and  $c > 0$  such that  
 620  $\langle v(x), p - x \rangle \geq c$  for all  $x \in \mathcal{U}$ .

621 Moreover, since  $\text{cl}(\mathcal{U})$  compact, we have  $\sup_{x \in \text{cl}(\mathcal{U})} \|v(x)\|_* = B < \infty$ . For the sake of contradiction,  
 622 suppose that  $x_n \rightarrow x'$ . Then,  $x_n \in \mathcal{U} \cap \mathbb{B}_{c/4B}(x')$  eventually, i.e., there exists  $n_0$  such that  $x_n \in \mathcal{U}$   
 623 and  $\|x_n - x'\| < c/4B$  for all  $n \geq n_0$ .

624 Finally, since  $y_n \in \partial h(x_n)$ , we have for  $n > n_0$ :

$$\begin{aligned}
 h(p) &\geq h(x_n) + \langle y_n, p - x_n \rangle \\
 &\geq h(x_n) + \langle y_{n_0}, p - x_n \rangle + \gamma \sum_{k=n_0}^{n-1} \langle v(x_k), p - x_n \rangle \\
 &\geq h(x_n) + \langle y_{n_0}, p - x_n \rangle + \gamma \sum_{k=n_0}^{n-1} \langle v(x_k), p - x_k + x_k - x_n \rangle \\
 &\geq h(x_n) + \langle y_{n_0}, p - x_n \rangle + \gamma \sum_{k=n_0}^{n-1} (\langle v(x_k), p - x_k \rangle + \langle v(x_k), x_k - x_n \rangle) \\
 &\geq h(x_n) + \langle y_{n_0}, p - x_n \rangle + \gamma \sum_{k=n_0}^{n-1} (\langle v(x_k), p - x_k \rangle - \|v(x_k)\|_* \|x_k - x_n\|) \\
 &\geq h(x_n) + \langle y_{n_0}, p - x_n \rangle + \gamma \sum_{k=n_0}^{n-1} (c - B \|x_k - x_n\|) \\
 &\geq h(x_n) - \|y_{n_0}\|_* \|p - x_n\| + \gamma \sum_{k=n_0}^{n-1} (c - c/2) \\
 &\geq \min h - \|y_{n_0}\|_* \text{diam}(\mathcal{X}) + \gamma c(n - n_0)/2
 \end{aligned} \tag{C.16}$$

625 Taking  $n \rightarrow \infty$ , we obtain  $h(p) \geq \infty$ , which is a contradiction. Therefore, the result follows. ■

626 Moving forward, we show that equilibrium points in the relative interior cannot be limit points of  
 627 (FTRL), either. Formally, we have:

628 **Proposition 2.** *Let  $x^* \in \text{ri}(\mathcal{X})$  be a Nash equilibrium of  $\mathcal{G}(\mathcal{N}, \mathcal{X}, u)$ , and  $(x_n)_{n \in \mathbb{N}}$  be the sequence*  
 629 *of play induced by (FTRL) with  $\hat{v}_n = v(x_n) + U_n$ , where  $U_n$  i.i.d. with  $\mathbb{E}[U_n] = 0$  and  $\text{cov}(U_n) \succ 0$*   
 630 *for all  $n \in \mathbb{N}$ . Then:*

$$\mathbb{P}\left(\lim_{n \rightarrow \infty} x_n = x^*\right) = 0 \quad \text{for any } x_1 \in \mathcal{X}_h. \tag{14}$$

631 *Proof.* Since  $x^*$  an equilibrium point in  $\text{ri}(\mathcal{X})$ , we readily get that  $\langle v(x^*), x - x^* \rangle = 0$  for all  $x \in \mathcal{X}$ ,  
 632 and  $x^* \in \mathcal{X}_h$ . In view of this, there exists  $y^* \in \mathcal{Y}$  such that  $y^* \in \partial h(x^*)$ , i.e.,  $x^* = Q(y^*)$ . Our goal is  
 633 to show that the auxiliary process  $y_n$  does not converge to  $\partial h(x^*)$ . However, there are infinitely many  
 634 points in  $\mathcal{Y}$  that belong to  $\partial h(x^*)$ , so this attempt is insufficient, in the sense that, showing that  $y^*$  is  
 635 not a limit point of the  $y_n$  dynamics, does not preclude that some other  $y \in \partial h(x^*)$  is not.

636 To tackle this issue, we will show that the space  $\mathcal{Y}$  can be decomposed as  $\mathcal{Y} = \widehat{\mathcal{Y}} \oplus \overline{\mathcal{Y}}$  where all the  
 637 “essential” deviations of the problem is in  $\overline{\mathcal{Y}}$ . For this, we define the set

$$\widehat{\mathcal{Y}} = \{y \in \mathcal{Y} : \langle y, p - x \rangle = 0, \text{ for all } x, p \in \mathcal{X}\}. \tag{C.17}$$

638 which is a subspace of  $\mathcal{Y}$ , and as the following lemma suggests, is equal to the polar cone at any point  
 639 in the relative interior.

640 **Lemma C.3.** Let  $x_0 \in \text{ri}(\mathcal{X})$  and  $\widehat{\mathcal{Y}} = \{y \in \mathcal{Y} : \langle y, p - x \rangle = 0, \text{ for all } x, p \in \mathcal{X}\}$ . Then  $\widehat{\mathcal{Y}} = \text{PC}(x_0)$ .

641 To preserve the clarity of the argument, we defer the proof of [Lemma C.3](#) until the end of this  
 642 proposition. Letting  $\overline{\mathcal{Y}}$  be the orthocomplement of  $\widehat{\mathcal{Y}}$ , we readily get that  $\mathcal{Y} = \widehat{\mathcal{Y}} \oplus \overline{\mathcal{Y}}$ , and any point  $y$   
 643 in  $\mathcal{Y}$  can be uniquely written as  $y = \hat{y} + \bar{y}$  with  $\hat{y} \in \widehat{\mathcal{Y}}$  and  $\bar{y} \in \overline{\mathcal{Y}}$ . Defining the linear map  $\Pi : \mathcal{Y} \rightarrow \mathcal{Y}$   
 644 as  $\Pi y = \bar{y}$ , and more importantly, under all points in  $\partial h(x^*)$  under  $\Pi$  are essentially unique.

645 This is formalized in the following lemma, whose proof is relegated after this proposition.

646 **Lemma C.4.** Let  $x_0 \in \text{ri}(\mathcal{X})$  and  $y, y' \in \partial h(x_0)$ . Then  $\Pi y \in \partial h(x_0)$ , and  $\Pi y = \Pi y'$ .

647 In view of the above, we are now ready to prove the result. Namely, fix some  $p \in \mathcal{X}$ ,  $p \neq x^*$  and let  
 648  $\xi_n := \langle \Pi U_n, p - x^* \rangle$ .

649 Then, setting  $\sigma^2 \equiv (p - x^*)^\top \Sigma (p - x^*) > 0$ , we have  $\xi_n \sim (0, \sigma^2)$  i.i.d., and, so, there exists  $\varepsilon, \delta > 0$   
 650 such that  $\mathbb{P}(\xi_n > \varepsilon) = \delta$  for all  $n \in \mathbb{N}$ . Therefore, by the second Borel-Cantelli lemma [\[9\]](#), we get  
 651  $\mathbb{P}(A) = 1$  for  $A \equiv \{\xi_n > \varepsilon \text{ infinitely often}\}$ . For the sake of contradiction, suppose that  $\mathbb{P}(B) > 0$   
 652 for  $B \equiv \{\lim_{n \rightarrow \infty} x_n = x^*\}$ . Fix some  $\omega \in B$ . Then, for all  $n$  large enough, we readily get that  
 653  $x_n(\omega) \in \text{ri}(\mathcal{X})$ , and, denoting  $z_n := \Pi y_n$  and  $z^* := \Pi y^*$ , we readily get that

$$\lim_{n \rightarrow \infty} z_n(\omega) = z^* \quad (\text{C.18})$$

654 Thus, setting  $\alpha_n \equiv \langle z_n - z^*, p - x^* \rangle$  we conclude by the above equality that  $\lim_{n \rightarrow \infty} \alpha_n = 0$ , and  
 655 therefore it holds

$$\begin{aligned} 0 &= \lim_{n \rightarrow \infty} (\alpha_n - \alpha_{n-1}) \\ &= \lim_{n \rightarrow \infty} \langle \Pi \hat{v}_n, p - x^* \rangle \\ &= \lim_{n \rightarrow \infty} \langle \Pi v(x_n), p - x^* \rangle + \langle \Pi U_n, p - x^* \rangle \\ &= \langle \Pi v(x^*), p - x^* \rangle + \lim_{n \rightarrow \infty} \xi_n \\ &= \lim_{n \rightarrow \infty} \xi_n \end{aligned} \quad (\text{C.19})$$

656 Therefore,  $\omega \notin A$ , which implies that  $B \subseteq A^c$ , with  $\mathbb{P}(A^c) = 0$ . Thus,  $\mathbb{P}(B) = 0$ , which is a  
 657 contradiction, and the result follows. ■

658 We now prove the two auxiliary lemmas presented in the proof of [Proposition 2](#).

660 **Lemma C.3.** Let  $x_0 \in \text{ri}(\mathcal{X})$  and  $\widehat{\mathcal{Y}} = \{y \in \mathcal{Y} : \langle y, p - x \rangle = 0, \text{ for all } x, p \in \mathcal{X}\}$ . Then  $\widehat{\mathcal{Y}} = \text{PC}(x_0)$ .

661 *Proof.* First, we will show that

$$\text{PC}(x_0) = \{y \in \mathcal{Y} : \langle y, p - x_0 \rangle = 0 \text{ for all } p \in \mathcal{X}\} \quad (\text{C.20})$$

662 For this, suppose that there exist  $y \in \text{PC}(x_0)$  and  $p' \in \mathcal{X}$  such  $\langle y, p' - x_0 \rangle < 0$ . Then, since  
 663  $x_0 \in \text{ri}(\mathcal{X})$ , there exists  $\alpha > 0$  such that  $x_0 - \alpha(p' - x_0) \in \mathcal{X}$ . By the definition of the polar cone,  
 664  $\langle y, x_0 - \alpha(p' - x_0) - x_0 \rangle \leq 0$ , or equivalently,  $\langle y, p' - x_0 \rangle \geq 0$ , which is a contradiction. Therefore,  
 665 [\(C.20\)](#) holds, which implies that  $\widehat{\mathcal{Y}} \subseteq \text{PC}(x)$ .

666 Now, for the inverse inclusion, let  $y \in \text{PC}(x_0)$  and  $p, x \in \mathcal{X}$ . Then, we have:

$$\begin{aligned} \langle y, p - x \rangle &= \langle y, p - x_0 + x_0 - x \rangle \\ &= \langle y, p - x_0 \rangle + \langle y, x_0 - x \rangle \\ &= 0 \end{aligned} \quad (\text{C.21})$$

667 where the last equality follows by [\(C.20\)](#). Thus,  $y \in \widehat{\mathcal{Y}}$ , and we conclude the result. ■

668 **Lemma C.4.** Let  $x_0 \in \text{ri}(\mathcal{X})$  and  $y, y' \in \partial h(x_0)$ . Then  $\Pi y \in \partial h(x_0)$ , and  $\Pi y = \Pi y'$ .

669 *Proof.* For the first part, note that

$$\begin{aligned}\langle y, p - x_0 \rangle &= \langle \hat{y} + \bar{y}, p - x_0 \rangle = \langle \hat{y}, p - x_0 \rangle + \langle \bar{y}, p - x_0 \rangle \\ &= \langle \bar{y}, p - x_0 \rangle \\ &= \langle \Pi y, p - x_0 \rangle\end{aligned}\tag{C.22}$$

670 which directly implies that  $\Pi y \in \partial h(x_0)$ . For the second part, since  $x_0 \in \text{ri}(\mathcal{X})$ , and  $y, y' \in \partial h(x_0)$ ,  
671 we have that

$$\langle y - y', p - x_0 \rangle = 0 \quad \text{for all } p \in \mathcal{X}\tag{C.23}$$

672 Thus  $y - y' \in \text{PC}(x_0)$ , and invoking [Lemma C.3](#) we obtain that  $y - y' \in \widehat{\mathcal{Y}}$ . Therefore, applying  
673 the linear projection operator  $\Pi$ , we readily get that  $\Pi(y - y') = 0$ , and, using linearity, the result  
674 follows. ■

675 We now turn to our main convergence theorems, showing that the iterates of [\(FTRL\)](#) converge with  
676 high probability under both gradient-based and payoff-based feedback

677 **Theorem 2.** *Let  $x^* \in \mathcal{X}$  be a strategically robust equilibrium of  $\mathcal{G}(\mathcal{N}, \mathcal{X}, u)$ . Fix a confidence level*  
678  *$\delta > 0$ , and let  $(x_n)_{n \in \mathbb{N}}$  be the iterates of [\(FTRL\)](#) with feedback provided by [\(SFO\)](#), and step-size*  
679  *$\gamma > 0$  sufficiently small. Then, there exists a neighborhood  $\mathcal{U}$  of  $x^*$  in  $\mathcal{X}_h$  such that:*

$$\mathbb{P}\left(\lim_{n \rightarrow \infty} x_n = x^*\right) \geq 1 - \delta \quad \text{if } x_1 \in \mathcal{U}.\tag{15}$$

680 *Proof.* Since  $x^*$  strategically robust,  $v(x^*)$  lies in the interior of the  $\text{PC}(x^*)$ . By [Lemma A.1](#), this  
681 implies in turn that there exists a polyhedral cone  $\mathcal{K}$  generated by  $\mathcal{Z} \equiv \{z_1, \dots, z_r\}$  for  $r \in \mathbb{N}$ , such  
682 that  $\text{TC}(x^*) \subseteq \mathcal{K}$  and  $\langle v(x^*), z \rangle < 0$  for all  $z \in \mathcal{Z}$ .<sup>4</sup> Therefore, for all  $z \in \mathcal{Z}$ , we have  $\langle v(x^*), z \rangle \leq -m$ ,  
683 and by continuity of the vector field  $v$ , there exists a neighborhood  $\mathcal{U}$  of  $x^*$  and  $c > 0$  such that  
684  $\langle v(x), z \rangle \leq -c$  for all  $z \in \mathcal{Z}$  and  $x \in \mathcal{U}$ .

685 Fixing some  $z \in \mathcal{Z}$ , we obtain:

$$\begin{aligned}\langle y_{n+1}, z \rangle &= \langle y_n, z \rangle + \gamma \langle \hat{v}_n, z \rangle \\ &= \langle y_n, z \rangle + \gamma \langle v(x_n), z \rangle + \gamma \langle U_n, z \rangle \\ &= \langle y_1, z \rangle + \gamma \sum_{k=1}^n \langle v(x_k), z \rangle + \gamma \sum_{k=1}^n \langle U_k, z \rangle\end{aligned}\tag{C.24}$$

686 Now, we define the stochastic process  $(S_n)_{n \in \mathbb{N}}$  via  $S_n := \gamma \sum_{k=1}^n \langle U_k, z \rangle$ , which is a martingale, since  
687  $\mathbb{E}[\langle U_k, z \rangle \mid \mathcal{F}_k] = 0$ .

688 Therefore, by [Lemma C.1](#) for  $\sigma_n \equiv \sigma$ ,  $q > 2$  and  $\mu \in (0, 1)$ , whose value is determined later, we get:

$$\delta_n := \mathbb{P}\left(\sup_{\ell \leq n} |S_\ell| > c(\gamma n)^\mu\right) \leq C_q \frac{\gamma^{q(1-\mu)} \sigma^q}{n^{q(\mu-1/2)}}\tag{C.25}$$

689 where  $C_q$  is a constant that depends only on  $c$  and  $q$ . Thus, we readily have that:

$$\begin{aligned}\mathbb{P}\left(\bigcap_{n \geq 1} \left\{\sup_{\ell \leq n} |S_\ell| \leq c(\gamma n)^\mu\right\}\right) &= 1 - \mathbb{P}\left(\bigcup_{n \geq 1} \left\{\sup_{\ell \leq n} |S_\ell| > c(\gamma n)^\mu\right\}\right) \\ &\geq 1 - \sum_{n=1}^{\infty} \mathbb{P}\left(\sup_{\ell \leq n} |S_\ell| > c(\gamma n)^\mu\right) \\ &\geq 1 - \sum_{n=1}^{\infty} \delta_n\end{aligned}\tag{C.26}$$

690 where the second inequality comes from the union bound. Now, we need to ensure that  $\sum_{n=1}^{\infty} \delta_n \leq \delta/r$ .  
691 For this, we need the sequence to be summable, which, using [\(C.25\)](#), is guaranteed for  $q(\mu-1/2) > 1$ ,  
692 or equivalently,  $\mu \in (1/2 + 1/q, 1)$ . Therefore, for  $\gamma > 0$  small enough, we obtain that  $\sum_{n=1}^{\infty} \delta_n \leq \delta/r$ .

<sup>4</sup>To resolve any ambiguities, the cone in question here is the polar of the cone provided by [Lemma A.1](#).

Therefore, with probability at least  $1 - \delta/r$ , the template inequality becomes:

$$\langle y_{n+1}, z \rangle \leq \langle y_1, z \rangle + \gamma \sum_{k=1}^n \langle v(x_k), z \rangle + c(\gamma n)^\mu \quad (\text{C.27})$$

If we initialize  $y_1$  such that  $\langle y_1, z' \rangle < -M - c$  for all  $z' \in \mathcal{Z}$ , we get that  $\langle y_n, z \rangle < -M$  for all  $n \in \mathbb{N}$  with probability at least  $1 - \delta/r$ . To see this, suppose that  $\langle y_k, z \rangle < -M$  for all  $k = 1, \dots, n$ . Then

$$\begin{aligned} \langle y_{n+1}, z \rangle &= \langle y_1, z \rangle + \gamma \sum_{k=1}^n \langle v(x_k), z \rangle + \gamma \sum_{k=1}^n \langle U_k, z \rangle \\ &\leq -M - c - c\gamma n + c(\gamma n)^\mu \end{aligned} \quad (\text{C.28})$$

For  $n \in \mathbb{N}$  with  $\gamma n < 1$ , we have  $-c + c(\gamma n)^\mu < 0$ , while for  $\gamma n \geq 1$ , it holds  $-c\gamma n + c(\gamma n)^\mu < 0$ . In both cases, we conclude that  $\langle y_{n+1}, z \rangle < -M$ , and by induction, we get the inequality.

Therefore, with probability at least  $1 - \delta/r$ , we have:

$$\langle y_{n+1}, z \rangle \leq -M - c - c\gamma n + c(\gamma n)^\mu \quad (\text{C.29})$$

and sending  $n \rightarrow \infty$ , we get  $\langle y_n, z \rangle \rightarrow -\infty$ .

Finally, repeating the same argument for all  $z \in \mathcal{Z}$  and applying a union bound, we readily get that  $\langle y_n, z \rangle \rightarrow -\infty$  with probability at least  $1 - \delta$ , and invoking [Proposition C.1](#), the result follows. ■

Having established the local convergence to  $x^*$  with high probability, we proceed to the convergence rate in the case of affinely constrained  $\mathcal{X}$  and decomposable regularizer  $h$ .

**Theorem 3.** *If, in addition,  $\mathcal{X}$  is a polyhedral domain and  $h$  is decomposable with kernel  $\theta$ , on the event  $E := \{\lim_{n \rightarrow \infty} x_n = x^*\}$  it holds:*

$$\|x_n - x^*\| = \phi(-\Theta(n)) \quad (16)$$

where  $\phi$  is the rate function defined via

$$\phi(z) := \begin{cases} (\theta')^{-1}(z) & \text{if } z > \theta'(0^+) \\ 0 & \text{if } z \leq \theta'(0^+) \end{cases} \quad (17)$$

*Proof.* By the definition of the iterates of [\(FTRL\)](#), we have:

$$Q(y_n) = \arg \min_{x \in \mathcal{X}} \{h(x) - \langle y_n, x \rangle : Ax = b, x \geq 0\} \quad (\text{C.30})$$

Introducing the Lagrangian

$$\mathcal{L}(x, \lambda, \mu) = h(x) - \langle y_n, x \rangle + \sum_{i=1}^m \lambda_i (a_i^\top x - b_i) - \sum_{j=1}^d \mu_j x_j \quad (\text{C.31})$$

with  $\lambda_i \in \mathbb{R}$  and  $\mu_j \geq 0$ , by the KKT conditions, we readily obtain:

$$y_n = \nabla h(x_n) + \sum_{\ell=1}^m \lambda_\ell a_\ell - \mu \quad (\text{C.32})$$

where  $\nabla h(x) = \sum_{\beta=1}^d \theta'(x_{\beta,n}) e_\beta$ , since  $\theta$  is continuously differentiable.

For the sequel, we define the set of active constraints at  $x^*$  as  $\text{act}(x^*) := \{\beta \in \{1, \dots, d\} : x_{\beta}^* = 0\}$ . Note that on the event of  $\{\lim_{n \rightarrow \infty} x_n = x^*\}$ , the iterates  $x_n$  lie in a neighborhood of  $x^*$ , as shown in [Theorem 2](#). Thus, all non-active indices  $\alpha \notin \text{act}(x^*)$  stay bounded away from zero, and so  $|\theta(x_{\alpha,n})|$  remains bounded for all  $n$ .

We treat the two cases separately: (i) the steep case, where  $h$  is steep – equivalently  $\theta(0^+) = -\infty$ , and (ii) the non-steep case, where  $h$  is not steep, i.e.,  $\theta'(0^+) > -\infty$ .

717 **The steep case.** We define the set of “good” indices  $\mathcal{I}$  at step  $n$  as:  $\beta \in \mathcal{I}$  if  $\theta'(x_{\beta,n}) \leq -\Theta(n)$ .  
 718 Our goal is to show that all indices  $\text{act}(x^*)$  of  $x_n$  are “good”. Fix some  $n \in \mathbb{N}$ .

719 Suppose that  $\text{act}(x^*) \setminus \mathcal{I} \neq \emptyset$ , and let  $P \geq 1$ , as per [Lemma C.2](#). Then,

- 720 • If condition (i) of [Lemma C.2](#) holds, there exists  $\beta'$  such that  $x_{\beta',n} \leq P \max\{x_{\alpha,n} : \alpha \in \mathcal{I}\}$ , and  
 721 thus,  $\mathcal{I} \leftarrow \mathcal{I} \cup \{\beta'\}$ .
- 722 • If condition (ii) of [Lemma C.2](#) holds, there exists  $z' \in \ker(A)$  such that  $\|z'\| \leq P$ ,  $z'_\beta = 0$  if  $\beta \in \mathcal{I}$   
 723 and  $1 \leq z'_\beta \leq P$  if  $\beta \in \text{act}(x^*) \setminus \mathcal{I}$ . By (C.32), and noting that  $z' \in \ker(A)$  and  $\mu = 0$ , since all  
 724 constraints are non-active due to steepness of  $h$ , we have:

$$\langle \nabla h(x_n), z' \rangle = \langle y_n, z' \rangle \quad (\text{C.33})$$

725 Moreover, it holds:

$$\begin{aligned} \langle \nabla h(x_n), z' \rangle &= \sum_{\beta=1}^d \theta'(x_{\beta,n}) z'_\beta = \sum_{\beta \in \mathcal{I}} \theta'(x_{\beta,n}) z'_\beta + \sum_{\beta \in \text{act}(x^*) \setminus \mathcal{I}} \theta'(x_{\beta,n}) z'_\beta + \sum_{\beta \notin \text{act}(x^*)} \theta'(x_{\beta,n}) z'_\beta \\ &= \sum_{\beta \in \text{act}(x^*) \setminus \mathcal{I}} \theta'(x_{\beta,n}) z'_\beta + C \end{aligned} \quad (\text{C.34})$$

726 for a constant  $C$ , since all non-active indices remain bounded away from zero, as explained in the  
 727 beginning. Now, note that  $z' \in \text{TC}(x^*)$ , and thus, by [Lemma A.1](#), we can write  $z' = \sum_{i=1}^r \ell_i z_i$   
 728 with  $\ell_i \geq 0$ , such that  $\langle y_n, z_i \rangle \leq -\Theta(n)$  for all  $i = 1, \dots, r$  as in the proof of [Theorem 2](#). So,  
 729 combining it with (C.39), (C.34), we obtain:

$$\sum_{\beta \in \text{act}(x^*) \setminus \mathcal{I}} \theta'(x_{\beta,n}) z'_\beta \leq -\Theta(n) \quad (\text{C.35})$$

730 and therefore, there exists at least one  $\beta' \in \text{act}(x^*) \setminus \mathcal{I}$  such that

$$\theta'(x_{\beta',n}) z'_{\beta'} \leq -\Theta(n) \quad (\text{C.36})$$

731 Thus,  $\mathcal{I} \leftarrow \mathcal{I} \cup \{\beta'\}$ .

732 Therefore, as  $\text{act}(x^*)$  is finite, we conclude inductively that  $\theta'(x_{\beta,n}) \leq -\Theta(n)$  for all  $\beta \in \text{act}(x^*)$ .  
 733 Finally, we have that  $\mathbb{R}^d = \text{row}(A) + \text{span}\{e_\beta : \beta \in \text{act}(x^*)\}$ , and thus, for all  $i$ , we can write the  
 734 standard basis vector  $e_i$  as  $e_i = \sum_{\beta \in \text{act}(x^*)} \lambda_{i,\beta} e_\beta + a_i$  for some  $a_i \in \text{row}(A)$

$$\begin{aligned} x_{i,n} - x_i^* &= \langle x_n - x^*, e_i \rangle = \left\langle x_n - x^*, \sum_{\beta \in \text{act}(x^*)} \lambda_{i,\beta} e_\beta + a_i \right\rangle \\ &= \left\langle x_n - x^*, \sum_{\beta \in \text{act}(x^*)} \lambda_{i,\beta} e_\beta \right\rangle \\ &= \sum_{\beta \in \text{act}(x^*)} \lambda_{i,\beta} x_{\beta,n} \end{aligned} \quad (\text{C.37})$$

735 where we used that  $\langle x_n - x^*, a_i \rangle = 0$ . Thus, since  $\theta'(x_{\beta,n}) \leq -\Theta(n)$  for all  $\beta \in \text{act}(x^*)$ , by the  
 736 equivalence of norms and the above, we conclude that

$$\|x_n - x^*\| = (\theta')^{-1}(-\Theta(n)) \quad (\text{C.38})$$

737 **The non-steep case.** For the non-steep case, we follow a similar approach, but with some modifi-  
 738 cations since the iterates of (FTRL) are not always in the interior of  $\mathcal{X}$ .

739 Specifically, let the set of “good” indices  $\mathcal{I}$  be defined as:  $\beta \in \mathcal{I}$  if  $x_{\beta,n} = 0$  or  $\theta'(x_{\beta,n}) \leq -\Theta(n)$ .  
 740 Our goal is to show that all indices  $\text{act}(x^*)$  of  $x_n$  are “good”. We construct  $\mathcal{I}$  sequentially, as before.

741 Suppose that  $\text{act}(x^*) \setminus \mathcal{I} \neq \emptyset$ , and let  $P \geq 1$ , as per [Lemma C.2](#). Then,

- 742 • If condition (i) of [Lemma C.2](#) holds, there exists  $\beta'$  such that  $x_{\beta',n} \leq P \max\{x_{\alpha,n} : \alpha \in \mathcal{I}\}$ , and  
 743 thus,  $\mathcal{I} \leftarrow \mathcal{I} \cup \{\beta'\}$ .

• If condition (ii) of [Lemma C.2](#) holds, there exists  $z' \in \ker(A)$  such that  $\|z'\| \leq P$ ,  $z'_\beta = 0$  if  $\beta \in \mathcal{I}$  and  $1 \leq z'_\beta \leq P$  if  $\beta \in \text{act}(x^*) \setminus \mathcal{I}$ . Therefore, we have

$$\begin{aligned} \langle \nabla h(x_n), z' \rangle &= \langle y_n, z' \rangle + \langle \mu, z' \rangle = \langle y_n, z' \rangle + \sum_{\beta \in \mathcal{I}} \mu_\beta z'_\beta + \sum_{\beta \in \text{act}(x^*) \setminus \mathcal{I}} \mu_\beta z'_\beta + \sum_{\beta \notin \text{act}(x^*)} \mu_\beta z'_\beta \\ &= \langle y_n, z' \rangle \end{aligned} \quad (\text{C.39})$$

where, in this case, we used that (i)  $z'_\beta = 0$  for  $\beta \in \mathcal{I}$ , (ii)  $\mu_\beta = 0$  by complementary slackness for  $\beta \notin \text{act}(x^*)$  since these constraints remain non-active for the whole process, and (iii)  $\mu_\beta = 0$ , again by complementary slackness for  $\beta \in \text{act}(x^*) \setminus \mathcal{I}$  since if they were active, we would have  $\beta \in \mathcal{I}$ . This, with the same argument as before, we conclude that

$$\sum_{\beta \in \text{act}(x^*) \setminus \mathcal{I}} \theta'(x_{\beta,n}) z'_\beta \leq -\Theta(n) \quad (\text{C.40})$$

and therefore, there exists at least one  $\beta' \in \text{act}(x^*) \setminus \mathcal{I}$  such that

$$\theta'(x_{\beta',n}) z'_{\beta'} \leq -\Theta(n) \quad (\text{C.41})$$

This holds until  $\beta'$  vanishes, which can lead to  $\mu_{\beta'} > 0$ . In either case, we have  $\mathcal{I} \leftarrow \mathcal{I} \cup \{\beta'\}$ .

Finally, since  $\text{act}(x^*)$  is finite, we conclude inductively that all for all  $\beta \in \text{act}(x^*)$ , we have either  $\theta'(x_{\beta,n}) \leq -\Theta(n)$  or  $x_{\beta,n} = 0$ . As in the steep case, we conclude

$$\|x_n - x^*\| = \phi(-\Theta(n)) \quad (\text{C.42})$$

■

We now shift to the payoff-based setting. The relevant result is restated below.

**Theorem 4.** *Let  $x^* \in \mathcal{X}$  be a strategically robust equilibrium of  $\mathcal{G}$ . Fix a confidence level  $\delta > 0$ , and let  $(x_n)_{n \in \mathbb{N}}$  be the iterates of (FTRL) run with (SPSA) with  $\varepsilon_n \propto 1/n^p$  for some  $p \in (0, 1/2)$  and step-size  $\gamma > 0$  sufficiently small. Then, there exists a neighborhood  $\mathcal{U}$  of  $x^*$  such that:*

$$\mathbb{P}\left(\lim_{n \rightarrow \infty} x_n = x^*\right) \geq 1 - \delta \quad \text{if } x_1 \in \mathcal{U}. \quad (18)$$

If, in addition,  $\mathcal{X}$  is affinely constrained and  $h$  is decomposable with kernel  $\theta$ , then, whenever  $x_n$  converges to  $x^*$ , we have:

$$\|x_n - x^*\| = \phi(-\Theta(n)). \quad (19)$$

*Proof.* First of all, we write  $\hat{v}_n$  in the following convenient form:

$$\hat{v}_n = v(x_n) + U_n + b_n \quad (\text{C.43})$$

with

$$U_n = \hat{v}_n - \mathbb{E}[\hat{v}_n | \mathcal{F}_n] \quad \text{and} \quad b_n = \mathbb{E}[\hat{v}_n | \mathcal{F}_n] - v(x_n) \quad (\text{C.44})$$

which, by [Proposition A.1](#), satisfy the bounds  $\|U_n\|_* = \mathcal{O}(1/\varepsilon_n)$  and  $\|b_n\|_* = \mathcal{O}(\varepsilon_n)$ . Now, as in the proof of [Theorem 2](#),  $v(x^*)$  lies in the interior of the  $\text{PC}(x^*)$ . By [Lemma A.1](#) this in turn implies that there exists a polyhedral cone  $\mathcal{K}$  generated by  $\mathcal{Z} \equiv \{z_1, \dots, z_r\}$  for  $r \in \mathbb{N}$ , such that  $\text{TC}(x^*) \subseteq \mathcal{K}$  and  $\langle v(x^*), z \rangle < 0$  for all  $z \in \mathcal{Z}$ .<sup>5</sup> Therefore, for all  $z \in \mathcal{Z}$ , we have  $\langle v(x^*), z \rangle \leq -m$ , and by continuity of the vector field  $v$ , there exists a neighborhood  $\mathcal{U}$  of  $x^*$  and  $c > 0$  such that  $\langle v(x), z \rangle \leq -c$  for all  $z \in \mathcal{Z}$  and  $x \in \mathcal{U}$ . Fix some  $z \in \mathcal{Z}$ . Then, unfolding the evolution of  $y_n$ , we have:

$$\begin{aligned} \langle y_{n+1}, z \rangle &= \langle y_n, z \rangle + \gamma \langle \hat{v}_n, z \rangle \\ &= \langle y_n, z \rangle + \gamma \langle v(x_n), z \rangle + \gamma \langle U_n, z \rangle + \gamma \langle b_n, z \rangle \\ &= \langle y_1, z \rangle + \gamma \sum_{k=1}^n \langle v(x_k), z \rangle + \gamma \sum_{k=1}^n \langle U_k, z \rangle + \gamma \sum_{k=1}^n \langle b_k, z \rangle \end{aligned} \quad (\text{C.45})$$

Now, we define the stochastic process  $(S_n)_{n \in \mathbb{N}}$  via  $S_n := \gamma \sum_{k=1}^n \langle U_k, z \rangle$ , which is a martingale, since  $\mathbb{E}[\langle U_k, z \rangle | \mathcal{F}_k] = 0$ , and  $\mathbb{E}[|\langle U_k, z \rangle|^q | \mathcal{F}_k] \leq \mathbb{E}[\|U_k\|_*^q | \mathcal{F}_k] = \mathcal{O}((1/\varepsilon_n)^q)$ .

<sup>5</sup>As before, to resolve any ambiguities, the cone in question here is the polar of the cone provided by [Lemma A.1](#).

Therefore, by Lemma C.1 for  $\sigma_n = \Theta(1/\varepsilon_n)$ ,  $q > 2$  and  $\mu \in (0, 1)$ , whose value is determined later, we get:

$$\delta_n := \mathbb{P}\left(\sup_{\ell \leq n} |S_\ell| > (c/2)(\gamma n)^\mu\right) \leq C_q \frac{\gamma^{q(1-\mu)} \sum_{k=1}^n \sigma_k^q}{n^{1+q(\mu-1/2)}} \quad (\text{C.46})$$

where  $C_q$  is a constant that depends only on  $c$  and  $q$ . Thus, for  $\varepsilon_n = \varepsilon/n^p$ , there exist  $B > 0$  such that:

$$\sum_{k=1}^n \sigma_k^q \leq B\varepsilon^{-q} \sum_{k=1}^n k^{pq} \leq B'\varepsilon^{-q} n^{1+pq} \quad (\text{C.47})$$

where we used that  $\sum_{k=1}^n k^{pq} = \Theta(n^{1+pq})$ . So, using the above bound, (C.48) becomes:

$$\delta_n \leq C'_q \frac{\gamma^{q(1-\mu)} \varepsilon^{-q} n^{1+pq}}{n^{1+q(\mu-1/2)}} \leq C'_q \frac{\gamma^{q(1-\mu)} \varepsilon^{-q}}{n^{q(\mu-1/2-p)}} \quad (\text{C.48})$$

Thus, we readily have that:

$$\begin{aligned} \mathbb{P}\left(\bigcap_{n \geq 1} \left\{\sup_{\ell \leq n} |S_\ell| \leq c(\gamma n)^\mu\right\}\right) &= 1 - \mathbb{P}\left(\bigcup_{n \geq 1} \left\{\sup_{\ell \leq n} |S_\ell| > c(\gamma n)^\mu\right\}\right) \\ &\geq 1 - \sum_{n=1}^{\infty} \mathbb{P}\left(\sup_{\ell \leq n} |S_\ell| > c(\gamma n)^\mu\right) \\ &\geq 1 - \sum_{n=1}^{\infty} \delta_n \end{aligned} \quad (\text{C.49})$$

Now, we need to show that there exists  $\mu \in (0, 1)$  and  $q > 2$  such that  $\sum_{n=1}^{\infty} \delta_n \leq \delta/r$ . In order for the sum to be finite, we need  $q(\mu - 1/2 - p) > 1$  which readily implies that  $p < \mu - 1/2 - 1/q$ .

For the bias term, since  $\|b_k\|_* = \Theta(\varepsilon_k)$ , we have:

$$\sum_{k=1}^n \langle b_k, z \rangle \leq \sum_{k=1}^n \|b_k\|_* \|z\| \leq \sum_{k=1}^n \|b_k\|_* \leq D \sum_{k=1}^n \varepsilon_k \leq D \sum_{k=1}^n \varepsilon/k^p \leq D' \varepsilon n^{1-p} \quad (\text{C.50})$$

for some  $D' > 0$ , where in the last inequality we used that  $\sum_{k=1}^n 1/k^p = \Theta(n^{1-p})$ .

Therefore, for  $1 - \mu < p$ , and  $\gamma < 1$ , we readily get that

$$\gamma \sum_{k=1}^n \langle b_k, z \rangle \leq D' \gamma \varepsilon n^\mu \leq D' \varepsilon (\gamma n)^\mu \quad (\text{C.51})$$

Therefore, we need to satisfy

$$1 - \mu < p < \mu - 1/2 - 1/q \quad (\text{C.52})$$

from which we obtain  $\mu \in (3/4, 1)$ . Thus, for  $p \in (0, 1/2)$ , there exist  $\mu \in (3/4, 1)$  and  $q > 2$  that satisfy (C.51). So, for  $\varepsilon, \gamma$  sufficiently small we can guarantee that

$$\gamma \sum_{k=1}^n \langle b_k, z \rangle \leq (c/2)(\gamma n)^\mu \quad \text{and} \quad \sum_{n=1}^{\infty} \delta_n \leq \delta/r \quad (\text{C.53})$$

Therefore, with probability at least  $1 - \delta/r$ , the template inequality becomes:

$$\begin{aligned} \langle y_{n+1}, z \rangle &\leq \langle y_1, z \rangle + \gamma \sum_{k=1}^n \langle v(x_k), z \rangle + (c/2)(\gamma n)^\mu + (c/2)(\gamma n)^\mu \\ &\leq \langle y_1, z \rangle + \gamma \sum_{k=1}^n \langle v(x_k), z \rangle + c(\gamma n)^\mu \end{aligned} \quad (\text{C.54})$$

Initializing  $y_1$  such that  $\langle y_1, z' \rangle < -M - c$  for all  $z' \in \mathcal{Z}$ , we have  $\langle y_n, z \rangle < -M$  for all  $n \in \mathbb{N}$  with probability at least  $1 - \delta/r$ . To see this, we proceed by induction, and suppose that  $\langle y_k, z \rangle < -M$  for all  $k = 1, \dots, n$ . Then

$$\langle y_{n+1}, z \rangle = \langle y_1, z \rangle + \gamma \sum_{k=1}^n \langle v(x_k), z \rangle + \gamma \sum_{k=1}^n \langle U_k, z \rangle + \gamma \sum_{k=1}^n \langle b_k, z \rangle$$

$$\leq -M - c - c\gamma n + c(\gamma n)^\mu \quad (\text{C.55})$$

For  $n \in \mathbb{N}$  with  $\gamma n < 1$ , we have  $-c + c(\gamma n)^\mu < 0$ , while for  $\gamma n \geq 1$ , it holds  $-c\gamma n + c(\gamma n)^\mu < 0$ . In both cases, we conclude that  $\langle y_{n+1}, z \rangle < -M$ , and by induction, we get the inequality.

Therefore, with probability at least  $1 - \delta/r$ , we have:

$$\langle y_{n+1}, z \rangle \leq -M - c - c\gamma n + c(\gamma n)^\mu \quad (\text{C.56})$$

and sending  $n \rightarrow \infty$ , we get  $\langle y_n, z \rangle \rightarrow -\infty$ .

As a final step, using the same argument for all  $z \in \mathcal{Z}$  and applying a union bound, we have that  $\langle y_n, z \rangle \rightarrow -\infty$  with probability at least  $1 - \delta$ , and by [Proposition C.1](#), we get that

$$\mathbb{P}\left(\lim_{n \rightarrow \infty} x_n = x^*\right) \geq 1 - \delta. \quad (\text{C.57})$$

If, in addition,  $\mathcal{X}$  is affinely constrained and  $h$  is decomposable with kernel  $\theta$ , then the argument in the proof of [Theorem 3](#) applies verbatim, yielding:

$$\|x_n - x^*\| = \phi(-\Theta(n)). \quad (\text{C.58})$$

whenever  $x_n$  converges to  $x^*$ . ■

We conclude this appendix with [Proposition 3](#), which illustrates that an extreme, non-strategically robust equilibrium may exhibit fundamentally different behavior depending on the choice of regularizer.

**Proposition 3.** *Consider the 1-player game  $\mathcal{G}$  with  $\mathcal{X} = [0, 1]$ ,  $u(x) = -\frac{3}{4}x^{4/3}$  and  $x^* = 0$ . Let  $(x_n)_{n \in \mathbb{N}}$  be the iterates of (FTRL) with  $\gamma < 1$ , and  $\hat{v}_n = v(x_n) + U_n$ , where  $U_n$  are i.i.d. standard normal random variables for all  $n \in \mathbb{N}$ . Then, for any initial condition  $y_1 \in \mathbb{R}$ , we have:*

- (i) For  $h(x) = x \log x$ , it holds  $\mathbb{P}(\lim_{n \rightarrow \infty} x_n = x^*) = 0$ .
- (ii) For  $h(x) = -2\sqrt{x}$ , it holds  $\mathbb{P}(\lim_{n \rightarrow \infty} x_n = x^*) = 1$ .

*Proof.* We show each case separately.

(i) Writing down the (FTRL) dynamics, we have

$$\begin{aligned} y_{n+1} &= y_n + \gamma(-x_n^{1/3} + U_n) \\ x_n &= \sup_{x \in [0, 1]} (y_n x - x \log x) \end{aligned} \quad (\text{C.59})$$

Solving the maximization problem in the definition of  $x_n$ , we obtain:

$$x_n = \begin{cases} \exp(y_n - 1), & \text{if } y_n \leq 1 \\ 1, & \text{if } y_n > 1 \end{cases}$$

or, equivalently,  $x_n = \mathbb{1}(y_n > 1) + \mathbb{1}(y_n \leq 1) \exp(y_n - 1)$  and the dual process can be written as:

$$y_{n+1} = y_n - \gamma \mathbb{1}(y_n > 1) - \gamma \mathbb{1}(y_n \leq 1) \exp((y_n - 1)/3) + \gamma U_n \quad (\text{C.60})$$

It is clear that  $x_n \rightarrow 0$  if and only if  $y_n \rightarrow -\infty$  as  $n$  goes to infinity. For notational convenience, set  $z_n \equiv -y_n$ . Then, the evolution of the dual process becomes:

$$z_{n+1} = z_n + \gamma \mathbb{1}(z_n < -1) + \gamma \mathbb{1}(z_n \geq -1) \exp((-z_n - 1)/3) - \gamma U_n \quad (\text{C.61})$$

Now, define the process

$$z'_{n+1} \equiv (z'_n + \gamma \mathbb{1}(z'_n < -1) + \gamma \mathbb{1}(z'_n \geq -1) \exp((-z'_n - 1)/3) - \gamma U_n)^+, \quad z'_1 = z_1 \quad (\text{C.62})$$

where  $U_n$  is the same random variable as in (C.61).

The rest of our proof relies on a series of claims, which we state and prove one-by-one.

**Claim 1.** *The process  $(z'_n)_{n \in \mathbb{N}}$  dominates  $(z_n)_{n \in \mathbb{N}}$ , i.e.,  $z'_n \geq z_n$  for all  $n \in \mathbb{N}$ .*

816 The proof of [Claim 1](#) lies at the end. Now, invoking [Theorem A.3](#) with

$$f(z) \equiv \gamma \mathbb{1}(z'_n < -1) + \gamma \mathbb{1}(z'_n \geq -1) \exp((-z'_n - 1)/3) \quad (\text{C.63})$$

817 bounded and  $\sigma^2 = \gamma^2$ , it holds that

$$f(z) \leq \frac{\sigma^2}{2z} \quad \text{for all } z \text{ large enough} \quad (\text{C.64})$$

818 Thus,  $(z'_n)_{n \in \mathbb{N}}$  is recurrent, which implies that

$$\mathbb{P}\left(\lim_{n \rightarrow \infty} z'_n = \infty\right) = 0 \quad (\text{C.65})$$

819 Finally, since  $(z'_n)_{n \in \mathbb{N}}$  dominates  $(z_n)_{n \in \mathbb{N}}$  by [Claim 1](#), we obtain

$$\left\{\lim_{n \rightarrow \infty} z_n = \infty\right\} \subseteq \left\{\lim_{n \rightarrow \infty} z'_n = \infty\right\} \quad (\text{C.66})$$

820 which implies that

$$\mathbb{P}\left(\lim_{n \rightarrow \infty} x_n = x^*\right) = \mathbb{P}\left(\lim_{n \rightarrow \infty} z_n = \infty\right) \leq \mathbb{P}\left(\lim_{n \rightarrow \infty} z'_n = \infty\right) = 0 \quad (\text{C.67})$$

821 and the result follows.

822 *Proof of Claim 1.* Consider the function

$$g(z) := z + \gamma \mathbb{1}(z_n < -1) + \gamma \mathbb{1}(z_n \geq -1) \exp((-z_n - 1)/3) \quad (\text{C.68})$$

823 Then:

- 824 • For  $z < -1$ :  $g'(z) = 1$
- 825 • For  $z > -1$ :  $g'(z) = 1 - \gamma/3 \exp((-z - 1)/3) > 1 - \gamma/3 > 0$

826 Thus,  $g$  is strictly increasing for all  $z \in \mathbb{R}$ . Now, for the sake of contradiction, suppose that there  
827 exists  $\omega \in \Omega$  and a first time  $k + 1 \in \mathbb{N}$  where the dominance does not hold, i.e.,

$$z_k(\omega) \leq z'_k(\omega) \quad \text{and} \quad z'_{k+1}(\omega) < z_{k+1}(\omega) \quad (\text{C.69})$$

828 By the monotonicity property of  $g$ , we get that

$$g(z_k(\omega)) \leq g(z'_k(\omega)) \quad (\text{C.70})$$

829 and, therefore, adding  $-\gamma U_k(\omega)$  in both sides

$$\begin{aligned} z_{k+1}(\omega) &\leq z'_k + \gamma \mathbb{1}(z'_n < -1) + \gamma \mathbb{1}(z'_n \geq -1) \exp((-z'_n - 1)/3) - \gamma U_k \\ &\leq (z'_k + \gamma \mathbb{1}(z'_n < -1) + \gamma \mathbb{1}(z'_n \geq -1) \exp((-z'_n - 1)/3) - \gamma U_k)^+ \\ &\leq z'_{k+1}(\omega) \end{aligned} \quad (\text{C.71})$$

830 which is a contradiction. Thus, the proof of [Claim 1](#) is complete.

831 (ii) In this setup, the (FTRL) dynamics are described by the system

$$\begin{aligned} y_{n+1} &= y_n + \gamma(-x_n^{1/3} + U_n) \\ x_n &= \sup_{x \in [0,1]} (y_n x + 2\sqrt{x}) \end{aligned} \quad (\text{C.72})$$

832 Solving the maximization problem in the definition of  $x_n$ , we obtain:

$$x_n = \begin{cases} (-y_n)^{-2}, & \text{if } y_n \leq -1 \\ 1, & \text{if } y_n > -1 \end{cases} \quad (\text{C.73})$$

833 or, equivalently,  $x_n = \mathbb{1}(y_n > -1) + \mathbb{1}(y_n \leq -1)(-y_n)^{-2}$  and the dual process can be written as:

$$y_{n+1} = y_n - \gamma \mathbb{1}(y_n > -1) - \gamma \mathbb{1}(y_n \leq -1)(-y_n)^{-2/3} + \gamma U_n \quad (\text{C.74})$$

834 For notational convenience, set  $z_n \equiv -y_n$ . Then, the evolution of the dual process becomes:

$$z_{n+1} = z_n + \gamma \mathbb{1}(z_n < 1) + \gamma \mathbb{1}(z_n \geq 1)z_n^{-2/3} - \gamma U_n \quad (\text{C.75})$$

835 It is clear that  $x_n \rightarrow 0$  if and only if  $z_n \rightarrow \infty$  as  $n$  goes to infinity. Now, define the process

$$z'_{n+1} = \left(z'_n + \gamma \mathbb{1}(z'_n < 1) + \gamma \mathbb{1}(z'_n \geq 1)z_n'^{-2/3} - \gamma U_n\right)^+, \quad z'_1 = z_1 \quad (\text{C.76})$$

836 where  $U_n$  is the same randomness as in [\(C.75\)](#).

837 **Claim 2.** *The process  $(z'_n)_{n \in \mathbb{N}}$  dominates  $(z_n)_{n \in \mathbb{N}}$ , i.e.,  $z'_n \geq z_n$  for all  $n \in \mathbb{N}$ .*

838 The proof of [Claim 2](#) lies at the end. Now, invoking [Theorem A.3](#) with

$$f(z) \equiv \gamma \mathbb{1}(z < 1) + \gamma \mathbb{1}(z \geq 1)z^{-2/3} \quad (\text{C.77})$$

839 bounded,  $\sigma^2 = \gamma^2$ , and  $\theta > 1$ , we have

$$f(z) \geq \frac{\sigma^2 \theta}{2z} \quad \text{for all } z \text{ large enough} \quad (\text{C.78})$$

840 Thus,  $(z'_n)_{n \in \mathbb{N}}$  is transient, which implies that  $\mathbb{P}(A) = 1$  for  $A = \{\omega \in \Omega : \lim_{n \rightarrow \infty} z'_n(\omega) = \infty\}$ .

841 Now, fix some  $\omega \in A$ . Since  $\lim_{n \rightarrow \infty} z'_n(\omega) = \infty$ , there exists  $n_\omega \in \mathbb{N}$  such that  $z'_n > 1$  for all  
842  $n \geq n_\omega$ , and therefore

$$\begin{aligned} z'_{n+1} &= z'_n + \gamma z_n'^{-2/3} - \gamma U_n \\ &= z'_{n_\omega} + \gamma \sum_{k=n_\omega+1}^n \left( z_k'^{-2/3} - U_k \right) \end{aligned} \quad (\text{C.79})$$

843 from which we conclude that

$$\sum_{k=n_\omega+1}^n \left( z_k'^{-2/3} - U_k \right) \rightarrow \infty \quad \text{as } n \rightarrow \infty \quad (\text{C.80})$$

844 Finally, we have that

$$z_{n+1} = z_{n_\omega} + \gamma \sum_{k=n_\omega+1}^n \left( \mathbb{1}(z_k < 1) + \mathbb{1}(z_k \geq 1)z_k^{-2/3} - U_k \right) \quad (\text{C.81})$$

845 and, since  $(z'_n)_{n \in \mathbb{N}}$  dominates  $(z_n)_{n \in \mathbb{N}}$ , and  $z'_n > 1$  for all  $n \geq n_\omega$ , we readily get that

$$\sum_{k=n_\omega+1}^n \left( \mathbb{1}(z_k < 1) + \mathbb{1}(z_k \geq 1)z_k^{-2/3} - U_k \right) \geq \sum_{k=n_\omega+1}^n \left( z_k'^{-2/3} - U_k \right) \quad (\text{C.82})$$

846 Thus, by [\(C.80\)](#), we conclude that

$$\sum_{k=n_\omega+1}^n \left( \mathbb{1}(z_k < 1) + \mathbb{1}(z_k \geq 1)z_k^{-2/3} - U_k \right) \rightarrow \infty \quad \text{as } n \rightarrow \infty \quad (\text{C.83})$$

847 which implies that  $\lim_{n \rightarrow \infty} z_n(\omega) = \infty$ . Therefore, we obtain that  $\lim_{n \rightarrow \infty} z_n(\omega) = \infty$  for all  $\omega \in A$ ,  
848 and since  $\mathbb{P}(A) = 1$ , it follows that

$$\mathbb{P}\left(\lim_{n \rightarrow \infty} x_n = x^*\right) = \mathbb{P}\left(\lim_{n \rightarrow \infty} z_n = \infty\right) = 1 \quad (\text{C.84})$$

849 and the proof is complete.

850 *Proof of [Claim 2](#).* Consider the function

$$g(z) := z + \gamma \mathbb{1}(z < 1) + \gamma \mathbb{1}(z \geq 1)z^{-2/3} \quad (\text{C.85})$$

851 Then:

- 852 • For  $z < 1$ :  $g'(z) = 1 + \gamma > 0$
- 853 • For  $z > 1$ :  $g'(z) = 1 - 2\gamma z^{-5/3}/3 > 1 - 2\gamma/3 > 0$

854 Thus,  $g$  is strictly increasing for all  $z \in \mathbb{R}$ . Now, for the sake of contradiction, suppose that there  
855 exists  $\omega \in \Omega$  and a first time  $k+1 \in \mathbb{N}$  where the dominance does not hold, i.e.,

$$z_k(\omega) \leq z'_k(\omega) \quad \text{and} \quad z'_{k+1}(\omega) < z_{k+1}(\omega) \quad (\text{C.86})$$

856 By the monotonicity property of  $g$ , we get that

$$g(z_k(\omega)) \leq g(z'_k(\omega)) \quad (\text{C.87})$$

857 and therefore, adding  $-\gamma U_k(\omega)$  in both sides

$$\begin{aligned} z_{k+1}(\omega) &\leq z'_k + \gamma \mathbb{1}(z'_k < 1) + \gamma \mathbb{1}(z'_k \geq 1)z_k'^{-2/3} - \gamma U_k \\ &\leq \left( z'_k + \gamma \mathbb{1}(z'_k < 1) + \gamma \mathbb{1}(z'_k \geq 1)z_k'^{-2/3} - \gamma U_k \right)^+ \\ &\leq z'_{k+1}(\omega) \end{aligned} \quad (\text{C.88})$$

858 which is a contradiction. Thus, the proof of [Claim 2](#) is complete. ■

## 859 NeurIPS Paper Checklist

### 860 1. Claims

861 Question: Do the main claims made in the abstract and introduction accurately reflect the paper's  
862 contributions and scope?

863 Answer: [\[Yes\]](#)

864 Justification: It can be found in [Section 3](#), [Section 4](#) and the appendix.

865 Guidelines:

- 866 • The answer NA means that the abstract and introduction do not include the claims made in the  
867 paper.
- 868 • The abstract and/or introduction should clearly state the claims made, including the contributions  
869 made in the paper and important assumptions and limitations. A No or NA answer to this  
870 question will not be perceived well by the reviewers.
- 871 • The claims made should match theoretical and experimental results, and reflect how much the  
872 results can be expected to generalize to other settings.
- 873 • It is fine to include aspirational goals as motivation as long as it is clear that these goals are not  
874 attained by the paper.

### 875 2. Limitations

876 Question: Does the paper discuss the limitations of the work performed by the authors?

877 Answer: [\[Yes\]](#)

878 Justification: It can be found in [Section 1](#).

879 Guidelines:

- 880 • The answer NA means that the paper has no limitation while the answer No means that the  
881 paper has limitations, but those are not discussed in the paper.
- 882 • The authors are encouraged to create a separate "Limitations" section in their paper.
- 883 • The paper should point out any strong assumptions and how robust the results are to violations of  
884 these assumptions (e.g., independence assumptions, noiseless settings, model well-specification,  
885 asymptotic approximations only holding locally). The authors should reflect on how these  
886 assumptions might be violated in practice and what the implications would be.
- 887 • The authors should reflect on the scope of the claims made, e.g., if the approach was only tested  
888 on a few datasets or with a few runs. In general, empirical results often depend on implicit  
889 assumptions, which should be articulated.
- 890 • The authors should reflect on the factors that influence the performance of the approach. For  
891 example, a facial recognition algorithm may perform poorly when image resolution is low or  
892 images are taken in low lighting. Or a speech-to-text system might not be used reliably to  
893 provide closed captions for online lectures because it fails to handle technical jargon.
- 894 • The authors should discuss the computational efficiency of the proposed algorithms and how  
895 they scale with dataset size.
- 896 • If applicable, the authors should discuss possible limitations of their approach to address  
897 problems of privacy and fairness.
- 898 • While the authors might fear that complete honesty about limitations might be used by reviewers  
899 as grounds for rejection, a worse outcome might be that reviewers discover limitations that  
900 aren't acknowledged in the paper. The authors should use their best judgment and recognize  
901 that individual actions in favor of transparency play an important role in developing norms that  
902 preserve the integrity of the community. Reviewers will be specifically instructed to not penalize  
903 honesty concerning limitations.

### 904 3. Theory assumptions and proofs

905 Question: For each theoretical result, does the paper provide the full set of assumptions and a  
906 complete (and correct) proof?

907 Answer: [\[Yes\]](#)

908 Justification: It can be found in [Section 3](#), [Section 4](#) and the appendix.

- 909 Guidelines:
- 910 • The answer NA means that the paper does not include theoretical results.
  - 911 • All the theorems, formulas, and proofs in the paper should be numbered and cross-referenced.
  - 912 • All assumptions should be clearly stated or referenced in the statement of any theorems.
  - 913 • The proofs can either appear in the main paper or the supplemental material, but if they appear
  - 914 in the supplemental material, the authors are encouraged to provide a short proof sketch to
  - 915 provide intuition.
  - 916 • Inversely, any informal proof provided in the core of the paper should be complemented by
  - 917 formal proofs provided in appendix or supplemental material.
  - 918 • Theorems and Lemmas that the proof relies upon should be properly referenced.

919 **4. Experimental result reproducibility**

920 Question: Does the paper fully disclose all the information needed to reproduce the main experi-  
921 mental results of the paper to the extent that it affects the main claims and/or conclusions of the  
922 paper (regardless of whether the code and data are provided or not)?

923 Answer: [NA]

924 Justification: The paper does not include experiments.

925 Guidelines:

- 926 • The answer NA means that the paper does not include experiments.
- 927 • If the paper includes experiments, a No answer to this question will not be perceived well by the
- 928 reviewers: Making the paper reproducible is important, regardless of whether the code and data
- 929 are provided or not.
- 930 • If the contribution is a dataset and/or model, the authors should describe the steps taken to make
- 931 their results reproducible or verifiable.
- 932 • Depending on the contribution, reproducibility can be accomplished in various ways. For
- 933 example, if the contribution is a novel architecture, describing the architecture fully might
- 934 suffice, or if the contribution is a specific model and empirical evaluation, it may be necessary
- 935 to either make it possible for others to replicate the model with the same dataset, or provide
- 936 access to the model. In general, releasing code and data is often one good way to accomplish
- 937 this, but reproducibility can also be provided via detailed instructions for how to replicate the
- 938 results, access to a hosted model (e.g., in the case of a large language model), releasing of a
- 939 model checkpoint, or other means that are appropriate to the research performed.
- 940 • While NeurIPS does not require releasing code, the conference does require all submissions
- 941 to provide some reasonable avenue for reproducibility, which may depend on the nature of the
- 942 contribution. For example
- 943 (a) If the contribution is primarily a new algorithm, the paper should make it clear how to
- 944 reproduce that algorithm.
- 945 (b) If the contribution is primarily a new model architecture, the paper should describe the
- 946 architecture clearly and fully.
- 947 (c) If the contribution is a new model (e.g., a large language model), then there should either be
- 948 a way to access this model for reproducing the results or a way to reproduce the model (e.g.,
- 949 with an open-source dataset or instructions for how to construct the dataset).
- 950 (d) We recognize that reproducibility may be tricky in some cases, in which case authors are
- 951 welcome to describe the particular way they provide for reproducibility. In the case of
- 952 closed-source models, it may be that access to the model is limited in some way (e.g.,
- 953 to registered users), but it should be possible for other researchers to have some path to
- 954 reproducing or verifying the results.

955 **5. Open access to data and code**

956 Question: Does the paper provide open access to the data and code, with sufficient instructions to

957 faithfully reproduce the main experimental results, as described in supplemental material?

958 Answer: [NA]

959 Justification: The paper does not include experiments.

960 Guidelines:

- The answer NA means that paper does not include experiments requiring code.
- Please see the NeurIPS code and data submission guidelines (<https://nips.cc/public/guides/CodeSubmissionPolicy>) for more details.
- While we encourage the release of code and data, we understand that this might not be possible, so “No” is an acceptable answer. Papers cannot be rejected simply for not including code, unless this is central to the contribution (e.g., for a new open-source benchmark).
- The instructions should contain the exact command and environment needed to run to reproduce the results. See the NeurIPS code and data submission guidelines (<https://nips.cc/public/guides/CodeSubmissionPolicy>) for more details.
- The authors should provide instructions on data access and preparation, including how to access the raw data, preprocessed data, intermediate data, and generated data, etc.
- The authors should provide scripts to reproduce all experimental results for the new proposed method and baselines. If only a subset of experiments are reproducible, they should state which ones are omitted from the script and why.
- At submission time, to preserve anonymity, the authors should release anonymized versions (if applicable).
- Providing as much information as possible in supplemental material (appended to the paper) is recommended, but including URLs to data and code is permitted.

## 6. Experimental setting/details

Question: Does the paper specify all the training and test details (e.g., data splits, hyperparameters, how they were chosen, type of optimizer, etc.) necessary to understand the results?

Answer: [NA]

Justification: The paper does not include experiments.

Guidelines:

- The answer NA means that the paper does not include experiments.
- The experimental setting should be presented in the core of the paper to a level of detail that is necessary to appreciate the results and make sense of them.
- The full details can be provided either with the code, in appendix, or as supplemental material.

## 7. Experiment statistical significance

Question: Does the paper report error bars suitably and correctly defined or other appropriate information about the statistical significance of the experiments?

Answer: [NA]

Justification: No statistical significance applicable.

Guidelines:

- The answer NA means that the paper does not include experiments.
- The authors should answer "Yes" if the results are accompanied by error bars, confidence intervals, or statistical significance tests, at least for the experiments that support the main claims of the paper.
- The factors of variability that the error bars are capturing should be clearly stated (for example, train/test split, initialization, random drawing of some parameter, or overall run with given experimental conditions).
- The method for calculating the error bars should be explained (closed form formula, call to a library function, bootstrap, etc.)
- The assumptions made should be given (e.g., Normally distributed errors).
- It should be clear whether the error bar is the standard deviation or the standard error of the mean.
- It is OK to report 1-sigma error bars, but one should state it. The authors should preferably report a 2-sigma error bar than state that they have a 96% CI, if the hypothesis of Normality of errors is not verified.
- For asymmetric distributions, the authors should be careful not to show in tables or figures symmetric error bars that would yield results that are out of range (e.g. negative error rates).

- 1012 • If error bars are reported in tables or plots, The authors should explain in the text how they were  
1013 calculated and reference the corresponding figures or tables in the text.

1014 **8. Experiments compute resources**

1015 Question: For each experiment, does the paper provide sufficient information on the computer  
1016 resources (type of compute workers, memory, time of execution) needed to reproduce the experi-  
1017 ments?

1018 Answer: [NA]

1019 Justification: The paper does not include experiments.

1020 Guidelines:

- 1021 • The answer NA means that the paper does not include experiments.  
1022 • The paper should indicate the type of compute workers CPU or GPU, internal cluster, or cloud  
1023 provider, including relevant memory and storage.  
1024 • The paper should provide the amount of compute required for each of the individual experimental  
1025 runs as well as estimate the total compute.  
1026 • The paper should disclose whether the full research project required more compute than the  
1027 experiments reported in the paper (e.g., preliminary or failed experiments that didn't make it  
1028 into the paper).

1029 **9. Code of ethics**

1030 Question: Does the research conducted in the paper conform, in every respect, with the NeurIPS  
1031 Code of Ethics <https://neurips.cc/public/EthicsGuidelines>?

1032 Answer: [Yes]

1033 Justification: The paper conforms with the NeurIPS Code of Ethics.

1034 Guidelines:

- 1035 • The answer NA means that the authors have not reviewed the NeurIPS Code of Ethics.  
1036 • If the authors answer No, they should explain the special circumstances that require a deviation  
1037 from the Code of Ethics.  
1038 • The authors should make sure to preserve anonymity (e.g., if there is a special consideration due  
1039 to laws or regulations in their jurisdiction).

1040 **10. Broader impacts**

1041 Question: Does the paper discuss both potential positive societal impacts and negative societal  
1042 impacts of the work performed?

1043 Answer: [NA]

1044 Justification: There is no societal impact.

1045 Guidelines:

- 1046 • The answer NA means that there is no societal impact of the work performed.  
1047 • If the authors answer NA or No, they should explain why their work has no societal impact or  
1048 why the paper does not address societal impact.  
1049 • Examples of negative societal impacts include potential malicious or unintended uses (e.g.,  
1050 disinformation, generating fake profiles, surveillance), fairness considerations (e.g., deploy-  
1051 ment of technologies that could make decisions that unfairly impact specific groups), privacy  
1052 considerations, and security considerations.  
1053 • The conference expects that many papers will be foundational research and not tied to par-  
1054 ticular applications, let alone deployments. However, if there is a direct path to any negative  
1055 applications, the authors should point it out. For example, it is legitimate to point out that  
1056 an improvement in the quality of generative models could be used to generate deepfakes for  
1057 disinformation. On the other hand, it is not needed to point out that a generic algorithm for  
1058 optimizing neural networks could enable people to train models that generate Deepfakes faster.  
1059 • The authors should consider possible harms that could arise when the technology is being used  
1060 as intended and functioning correctly, harms that could arise when the technology is being used  
1061 as intended but gives incorrect results, and harms following from (intentional or unintentional)  
1062 misuse of the technology.

- 1063 • If there are negative societal impacts, the authors could also discuss possible mitigation strategies  
1064 (e.g., gated release of models, providing defenses in addition to attacks, mechanisms for  
1065 monitoring misuse, mechanisms to monitor how a system learns from feedback over time,  
1066 improving the efficiency and accessibility of ML).

## 1067 11. Safeguards

1068 Question: Does the paper describe safeguards that have been put in place for responsible release of  
1069 data or models that have a high risk for misuse (e.g., pretrained language models, image generators,  
1070 or scraped datasets)?

1071 Answer: [NA]

1072 Justification: There are no such risks.

1073 Guidelines:

- 1074 • The answer NA means that the paper poses no such risks.  
1075 • Released models that have a high risk for misuse or dual-use should be released with necessary  
1076 safeguards to allow for controlled use of the model, for example by requiring that users adhere  
1077 to usage guidelines or restrictions to access the model or implementing safety filters.  
1078 • Datasets that have been scraped from the Internet could pose safety risks. The authors should  
1079 describe how they avoided releasing unsafe images.  
1080 • We recognize that providing effective safeguards is challenging, and many papers do not require  
1081 this, but we encourage authors to take this into account and make a best faith effort.

## 1082 12. Licenses for existing assets

1083 Question: Are the creators or original owners of assets (e.g., code, data, models), used in the  
1084 paper, properly credited and are the license and terms of use explicitly mentioned and properly  
1085 respected?

1086 Answer: [NA]

1087 Justification: The paper does not use existing assets.

1088 Guidelines:

- 1089 • The answer NA means that the paper does not use existing assets.  
1090 • The authors should cite the original paper that produced the code package or dataset.  
1091 • The authors should state which version of the asset is used and, if possible, include a URL.  
1092 • The name of the license (e.g., CC-BY 4.0) should be included for each asset.  
1093 • For scraped data from a particular source (e.g., website), the copyright and terms of service of  
1094 that source should be provided.  
1095 • If assets are released, the license, copyright information, and terms of use in the package should  
1096 be provided. For popular datasets, [paperswithcode.com/datasets](https://paperswithcode.com/datasets) has curated licenses for  
1097 some datasets. Their licensing guide can help determine the license of a dataset.  
1098 • For existing datasets that are re-packaged, both the original license and the license of the derived  
1099 asset (if it has changed) should be provided.  
1100 • If this information is not available online, the authors are encouraged to reach out to the asset's  
1101 creators.

## 1102 13. New assets

1103 Question: Are new assets introduced in the paper well documented and is the documentation  
1104 provided alongside the assets?

1105 Answer: [NA]

1106 Justification: The paper does not release new assets.

1107 Guidelines:

- 1108 • The answer NA means that the paper does not release new assets.  
1109 • Researchers should communicate the details of the dataset/code/model as part of their sub-  
1110 missions via structured templates. This includes details about training, license, limitations,  
1111 etc.

- The paper should discuss whether and how consent was obtained from people whose asset is used.
- At submission time, remember to anonymize your assets (if applicable). You can either create an anonymized URL or include an anonymized zip file.

#### 14. Crowdsourcing and research with human subjects

Question: For crowdsourcing experiments and research with human subjects, does the paper include the full text of instructions given to participants and screenshots, if applicable, as well as details about compensation (if any)?

Answer: [NA]

Justification: The paper does not involve crowdsourcing nor research with human subjects.

Guidelines:

- The answer NA means that the paper does not involve crowdsourcing nor research with human subjects.
- Including this information in the supplemental material is fine, but if the main contribution of the paper involves human subjects, then as much detail as possible should be included in the main paper.
- According to the NeurIPS Code of Ethics, workers involved in data collection, curation, or other labor should be paid at least the minimum wage in the country of the data collector.

#### 15. Institutional review board (IRB) approvals or equivalent for research with human subjects

Question: Does the paper describe potential risks incurred by study participants, whether such risks were disclosed to the subjects, and whether Institutional Review Board (IRB) approvals (or an equivalent approval/review based on the requirements of your country or institution) were obtained?

Answer: [NA]

Justification: The paper does not involve crowdsourcing nor research with human subjects.

Guidelines:

- The answer NA means that the paper does not involve crowdsourcing nor research with human subjects.
- Depending on the country in which research is conducted, IRB approval (or equivalent) may be required for any human subjects research. If you obtained IRB approval, you should clearly state this in the paper.
- We recognize that the procedures for this may vary significantly between institutions and locations, and we expect authors to adhere to the NeurIPS Code of Ethics and the guidelines for their institution.
- For initial submissions, do not include any information that would break anonymity (if applicable), such as the institution conducting the review.

#### 16. Declaration of LLM usage

Question: Does the paper describe the usage of LLMs if it is an important, original, or non-standard component of the core methods in this research? Note that if the LLM is used only for writing, editing, or formatting purposes and does not impact the core methodology, scientific rigor, or originality of the research, declaration is not required.

Answer: [NA]

Justification: The core method development in this research does not involve LLMs as any important, original, or non-standard components.

Guidelines:

- The answer NA means that the core method development in this research does not involve LLMs as any important, original, or non-standard components.
- Please refer to our LLM policy (<https://neurips.cc/Conferences/2025/LLM>) for what should or should not be described.
